# Supplementary material for: Overwintering temperature and body condition shift emergence dates of spring-emerging solitary bees
Source: PeerJ. 2018 May 16;6:e4721. doi: 10.7717/peerj.4721 (PMC5960268; doi:10.7717/peerj.4721)
Supplement: Supplemental Information 2 [file peerj-06-4721-s004.xlsx]

## Sheet: emergence date and weight at em
ID	treatment	species	Julian date	head.width	head.width^2	dry.weight.mg	weight corrected for size [mg/mm^2]	sex
cswr001	warm	O_cornuta	60	3.5	12.25	32.4	2.6449	m
cswe087	warm	O_cornuta	61	4.3	18.49	62.2	3.36398	f
cswr002	warm	O_cornuta	61	3.5	12.25	35.1	2.86531	m
cswr003	warm	O_cornuta	65	3.5	12.25	29.3	2.39184	m
cswe063	warm	O_cornuta	66	3.7	13.69	38.3	2.79766	m
cswr004	warm	O_cornuta	68	3.6	12.96	37.5	2.89352	m
cswe071	warm	O_cornuta	68	3.5	12.25	34.9	2.84898	m
cswr005	warm	O_cornuta	69	3.6	12.96	31.3	2.41512	m
cswe028	warm	O_cornuta	70	3.8	14.44	38.9	2.69391	m
cswr008	warm	O_cornuta	70	3.7	13.69	37.1	2.71001	m
cswr006	warm	O_cornuta	70	3.7	13.69	39.3	2.87071	m
cswr007	warm	O_cornuta	70	3.6	12.96	34.5	2.66204	m
cswr011	warm	O_cornuta	71	3.5	12.25	29	2.36735	m
cswr010	warm	O_cornuta	71	3.8	14.44	43.7	3.02632	m
cswr009	warm	O_cornuta	71	4.1	16.81	44.7	2.65913	m
cswr012	warm	O_cornuta	72	3.6	12.96	32.8	2.53086	m
cswr013	warm	O_cornuta	73	3.6	12.96	33	2.5463	m
cswr014	warm	O_cornuta	73	3.8	14.44	37	2.56233	m
cswe009	warm	O_cornuta	73	3.8	14.44	34.9	2.4169	m
cswr015	warm	O_cornuta	74	3.6	12.96	37	2.85494	m
cswr016	warm	O_cornuta	74	3.6	12.96	30	2.31481	m
cswr017	warm	O_cornuta	74	3.7	13.69	38.3	2.79766	m
cswr018	warm	O_cornuta	74	3.6	12.96	36.9	2.84722	m
cswr019	warm	O_cornuta	74	4.2	17.64	58	3.28798	m
cswr020	warm	O_cornuta	74	3.7	13.69	41.1	3.00219	m
cswr021	warm	O_cornuta	74	3.9	15.21	42.8	2.81394	m
cswr022	warm	O_cornuta	74	3.5	12.25	31.6	2.57959	m
cswr023	warm	O_cornuta	74	3.4	11.56	31.5	2.72491	m
cswr024	warm	O_cornuta	74	3.8	14.44	37.3	2.5831	m
cswr025	warm	O_cornuta	74	3.8	14.44	44.4	3.07479	m
cswe012	warm	O_cornuta	75	3.7	13.69	40.2	2.93645	m
cswe066	warm	O_cornuta	75	3.5	12.25	30.4	2.48163	m
cswe072	warm	O_cornuta	75	3.8	14.44	39.5	2.73546	m
cswr026	warm	O_cornuta	75	3.8	14.44	38.5	2.6662	m
cswr027	warm	O_cornuta	75	4.1	16.81	51.3	3.05175	m
cswr028	warm	O_cornuta	75	3.5	12.25	33.6	2.74286	m
cswr029	warm	O_cornuta	75	4.1	16.81	53.8	3.20048	m
cswe025	warm	O_cornuta	76	3.5	12.25	31.9	2.60408	m
cswr030	warm	O_cornuta	76	3.8	14.44	41.2	2.85319	m
cswr031	warm	O_cornuta	76	3.7	13.69	30.6	2.23521	m
cswr032	warm	O_cornuta	76	3.5	12.25	32.7	2.66939	m
cswr033	warm	O_cornuta	76	3.6	12.96	34.2	2.63889	m
cswr034	warm	O_cornuta	76	3.6	12.96	37.5	2.89352	m
cswr035	warm	O_cornuta	76	3.5	12.25	32.2	2.62857	m
cswr036	warm	O_cornuta	76	3.6	12.96	33.6	2.59259	m
cswr037	warm	O_cornuta	76	3.7	13.69	42.7	3.11907	m
cswr038	warm	O_cornuta	76	3.6	12.96	37.6	2.90123	m
cswr039	warm	O_cornuta	76	3.7	13.69	36.9	2.6954	m
cswr040	warm	O_cornuta	76	3.8	14.44	38.4	2.65928	m
cswe073	warm	O_cornuta	77	3.6	12.96	32.5	2.50772	m
cswe058	warm	O_cornuta	77	3.7	13.69	35.3	2.57852	m
cswe037	warm	O_cornuta	77	3.6	12.96	36.7	2.83179	m
cswe020	warm	O_cornuta	77	3.8	14.44	36.3	2.51385	m
cswr049	warm	O_cornuta	77	3.8	14.44	39.7	2.74931	m
cswr048	warm	O_cornuta	77	3.6	12.96	28.2	2.17593	m
cswr047	warm	O_cornuta	77	3.5	12.25	31.3	2.5551	m
cswr046	warm	O_cornuta	77	3.7	13.69	33.1	2.41782	m
cswr045	warm	O_cornuta	77	3.9	15.21	43.2	2.84024	m
cswr044	warm	O_cornuta	77	3.7	13.69	38.5	2.81227	m
cswr043	warm	O_cornuta	77	3.5	12.25	31.9	2.60408	m
cswr042	warm	O_cornuta	77	3.9	15.21	43.4	2.85339	m
cswr041	warm	O_cornuta	77	3.8	14.44	44.7	3.09557	m
cswe005	warm	O_cornuta	78	3.7	13.69	41.6	3.03871	m
cswe027	warm	O_cornuta	78	3.2	10.24	25.3	2.4707	m
cswe017	warm	O_cornuta	78	4.1	16.81	54	3.21237	m
cswe022	warm	O_cornuta	78	4.1	16.81	54.4	3.23617	m
cswe068	warm	O_cornuta	78	3.7	13.69	34.6	2.52739	m
cswe095	warm	O_cornuta	78	3.6	12.96	35.4	2.73148	m
cswr050	warm	O_cornuta	78	3.4	11.56	28.5	2.4654	m
cswr051	warm	O_cornuta	78	3.5	12.25	34.4	2.80816	m
cswr052	warm	O_cornuta	78	3.4	11.56	30.5	2.63841	m
cswr053	warm	O_cornuta	78	3.5	12.25	28.4	2.31837	m
cswr054	warm	O_cornuta	78	3.7	13.69	33	2.41052	m
cswr055	warm	O_cornuta	78	3.3	10.89	27.8	2.5528	m
cswr056	warm	O_cornuta	78	3.6	12.96	34	2.62346	m
cswr057	warm	O_cornuta	78	3.5	12.25	34	2.77551	m
cswr058	warm	O_cornuta	78	3.6	12.96	31.4	2.42284	m
cswr059	warm	O_cornuta	78	3.7	13.69	37.2	2.71731	m
cswe097	warm	O_cornuta	79	3.4	11.56	25.9	2.24048	m
cswr060	warm	O_cornuta	79	4.2	17.64	59.6	3.37868	m
cswr061	warm	O_cornuta	79	3.6	12.96	38.4	2.96296	m
cswr062	warm	O_cornuta	79	3.7	13.69	38.5	2.81227	m
cswr063	warm	O_cornuta	79	3.5	12.25	33.8	2.75918	m
cswr064	warm	O_cornuta	79	3.8	14.44	42	2.90859	m
cswe096	warm	O_cornuta	80	3.6	12.96	36.6	2.82407	m
cswe074	warm	O_cornuta	80	3.7	13.69	34.6	2.52739	m
cswe059	warm	O_cornuta	80	3.7	13.69	36.5	2.66618	m
cswr065	warm	O_cornuta	80	3.6	12.96	30.5	2.3534	m
cswr066	warm	O_cornuta	80	3.8	14.44	37.7	2.6108	m
cswr067	warm	O_cornuta	80	3.7	13.69	35.9	2.62235	m
cswr068	warm	O_cornuta	80	3.7	13.69	32.6	2.3813	m
cswr069	warm	O_cornuta	80	4.3	18.49	52.5	2.83937	m
cswe077	warm	O_cornuta	81	3.7	13.69	36.9	2.6954	m
cswe078	warm	O_cornuta	81	3.4	11.56	26.9	2.32699	m
cswe051	warm	O_cornuta	81	3.6	12.96	40.3	3.10957	m
cswe082	warm	O_cornuta	81	3.4	11.56	29.5	2.5519	m
cswr071	warm	O_cornuta	81	3.4	11.56	26.4	2.28374	m
cswr070	warm	O_cornuta	81	3.4	11.56	30.4	2.62976	m
cswe032	warm	O_cornuta	82	3.8	14.44	37.1	2.56925	m
cswe023	warm	O_cornuta	82	3.7	13.69	36.8	2.68809	m
cswr072	warm	O_cornuta	82	3.7	13.69	41.3	3.0168	m
cswr073	warm	O_cornuta	82	3.5	12.25	32.1	2.62041	m
cswr074	warm	O_cornuta	82	3.5	12.25	28.5	2.32653	m
cswe086	warm	O_cornuta	83	3.6	12.96	36.4	2.80864	m
cswr075	warm	O_cornuta	83	3.9	15.21	42.8	2.81394	m
cswr076	warm	O_cornuta	83	3.3	10.89	26.1	2.39669	m
cswr077	warm	O_cornuta	83	4.5	20.25	66.2	3.26914	f
cswr078	warm	O_cornuta	83	3.4	11.56	27.7	2.39619	m
cswr079	warm	O_cornuta	83	3.7	13.69	35.8	2.61505	m
cswr080	warm	O_cornuta	83	3.6	12.96	34.5	2.66204	m
cswr081	warm	O_cornuta	83	3.5	12.25	34.6	2.82449	m
cswr082	warm	O_cornuta	85	3.3	10.89	24.8	2.27732	m
cswe039	warm	O_cornuta	87	3.7	13.69	37.7	2.75383	m
cswr083	warm	O_cornuta	87	3.5	12.25	30.7	2.50612	m
cswe047	warm	O_cornuta	89	3.6	12.96	34	2.62346	m
cswe057	warm	O_cornuta	89	3.7	13.69	38.1	2.78305	m
cswe070	warm	O_cornuta	90	4.2	17.64	62.7	3.55442	f
cswe026	warm	O_cornuta	90	4.1	16.81	49	2.91493	f
cswe084	warm	O_cornuta	90	3.6	12.96	32.5	2.50772	m
cswe060	warm	O_cornuta	90	4.4	19.36	62.4	3.22314	f
cswe003	warm	O_cornuta	90	4.6	21.16	63.4	2.99622	f
cswe093	warm	O_cornuta	90	3.7	13.69	31.1	2.27173	m
cswe053	warm	O_cornuta	90	3.8	14.44	37.6	2.60388	m
cswe040	warm	O_cornuta	90	4.3	18.49	59.3	3.20714	f
cswe062	warm	O_cornuta	90	4.7	22.09	68.6	3.10548	f
cswe008	warm	O_cornuta	90	4.5	20.25	66.3	3.27407	f
cswe018	warm	O_cornuta	90	4.5	20.25	61.4	3.0321	f
cswe046	warm	O_cornuta	90	4.3	18.49	56.5	3.05571	f
cswe011	warm	O_cornuta	90	4.5	20.25	65.5	3.23457	f
cswe042	warm	O_cornuta	90	4.2	17.64	53.1	3.0102	f
cswe055	warm	O_cornuta	90	4.5	20.25	69.02	3.4084	f
cswe083	warm	O_cornuta	90	4.2	17.64	53.7	3.04422	f
cswe069	warm	O_cornuta	90	4.5	20.25	66.8	3.29877	f
cswe079	warm	O_cornuta	90	4.3	18.49	53.8	2.90968	f
cswe090	warm	O_cornuta	90	3.3	10.89	29.1	2.67218	m
cswe019	warm	O_cornuta	90	4.4	19.36	61.1	3.15599	f
cswe024	warm	O_cornuta	90	4.3	18.49	58.2	3.14765	f
cswe045	warm	O_cornuta	90	4.2	17.64	46.3	2.62472	f
cswe054	warm	O_cornuta	90	4.3	18.49	60.9	3.29367	f
cswr085	warm	O_cornuta	90	4.4	19.36	62.2	3.21281	f
cswr086	warm	O_cornuta	90	4.6	21.16	74.4	3.51607	f
cswr087	warm	O_cornuta	90	4.1	16.81	55.4	3.29566	f
cswr088	warm	O_cornuta	90	4.1	16.81	54.1	3.21832	f
cswr089	warm	O_cornuta	90	3.5	12.25	24.7	2.01633	m
cswr090	warm	O_cornuta	90	4.2	17.64	53.8	3.04989	f
cswr091	warm	O_cornuta	90	3.6	12.96	30.2	2.33025	m
cswr092	warm	O_cornuta	90	4.3	18.49	49.2	2.6609	f
cswr093	warm	O_cornuta	90	4.2	17.64	49.5	2.80612	f
cswr094	warm	O_cornuta	90	4	16	54.6	3.4125	f
cswr095	warm	O_cornuta	90	4	16	48.7	3.04375	f
cswr096	warm	O_cornuta	90	4.1	16.81	53.2	3.16478	f
cswr097	warm	O_cornuta	90	4.5	20.25	61	3.01235	f
cswr098	warm	O_cornuta	90	4.2	17.64	55.8	3.16327	f
cswr099	warm	O_cornuta	90	4.5	20.25	65.5	3.23457	f
cswr100	warm	O_cornuta	90	3.5	12.25	26.7	2.17959	m
cswr101	warm	O_cornuta	90	2.9	8.41	21.1	2.50892	f
cswr102	warm	O_cornuta	90	4.3	18.49	58.3	3.15306	f
cswr103	warm	O_cornuta	90	4.5	20.25	66.3	3.27407	f
cswr104	warm	O_cornuta	90	3.2	10.24	18.5	1.80664	m
cswr105	warm	O_cornuta	90	4	16	42.7	2.66875	f
cswr106	warm	O_cornuta	90	3.6	12.96	31.9	2.46142	m
cswr107	warm	O_cornuta	90	3.6	12.96	34.4	2.65432	m
cswr108	warm	O_cornuta	90	4.4	19.36	61.6	3.18182	f
cswr109	warm	O_cornuta	90	4.2	17.64	58.8	3.33333	f
cswr110	warm	O_cornuta	90	4.1	16.81	52	3.0934	f
cswr111	warm	O_cornuta	90	4	16	44.9	2.80625	f
cswr112	warm	O_cornuta	90	4.4	19.36	53.9	2.78409	f
cswr113	warm	O_cornuta	90	4.2	17.64	53.7	3.04422	f
cswr114	warm	O_cornuta	90	4.6	21.16	66.5	3.14272	f
cswr115	warm	O_cornuta	90	4.1	16.81	45.8	2.72457	m
cswr116	warm	O_cornuta	90	4.4	19.36	59.9	3.09401	f
cswr117	warm	O_cornuta	90	4.1	16.81	57.1	3.39679	f
cswr118	warm	O_cornuta	90	4	16	46.7	2.91875	f
cswr119	warm	O_cornuta	90	4.1	16.81	46.7	2.77811	f
cswr120	warm	O_cornuta	90	4.5	20.25	57.9	2.85926	f
cswr121	warm	O_cornuta	90	4.1	16.81	56.7	3.37299	f
cswr122	warm	O_cornuta	90	4.1	16.81	47.1	2.8019	f
cswr123	warm	O_cornuta	90	4.4	19.36	64	3.30579	f
cswr124	warm	O_cornuta	90	4.2	17.64	56	3.1746	f
cswr125	warm	O_cornuta	90	3.6	12.96	35.5	2.7392	f
cswr126	warm	O_cornuta	90	4.2	17.64	55.4	3.14059	f
cswr127	warm	O_cornuta	90	4.2	17.64	57.3	3.2483	f
cswr128	warm	O_cornuta	90	4.2	17.64	54	3.06122	f
cswr129	warm	O_cornuta	90	4.4	19.36	59.5	3.07335	f
cswe030	warm	O_cornuta	91	4.3	18.49	52.2	2.82315	f
cswe076	warm	O_cornuta	91	4.3	18.49	55	2.97458	f
cswe033	warm	O_cornuta	91	4.6	21.16	61.4	2.9017	f
cswe043	warm	O_cornuta	91	4.5	20.25	58.5	2.88889	f
cswe049	warm	O_cornuta	91	4.2	17.64	52.9	2.99887	f
cswe015	warm	O_cornuta	91	3.6	12.96	27.4	2.1142	m
cswe064	warm	O_cornuta	91	3.5	12.25	29.7	2.42449	m
cswe089	warm	O_cornuta	91	4.4	19.36	59.8	3.08884	f
cswe021	warm	O_cornuta	91	4.5	20.25	61.3	3.02716	f
cswe004	warm	O_cornuta	91	4.1	16.81	59.7	3.55146	f
cswr130	warm	O_cornuta	91	4.3	18.49	62.9	3.40184	f
cswr131	warm	O_cornuta	91	4.2	17.64	54.2	3.07256	f
cswr132	warm	O_cornuta	91	4.6	21.16	68.5	3.23724	f
cswr133	warm	O_cornuta	91	4.2	17.64	56.6	3.20862	f
cswr134	warm	O_cornuta	91	4.6	21.16	67.6	3.19471	f
cswr135	warm	O_cornuta	91	4.5	20.25	62	3.06173	f
cswr136	warm	O_cornuta	91	4.7	22.09	75.8	3.43142	f
cswr137	warm	O_cornuta	91	4.5	20.25	62.6	3.09136	f
cswr138	warm	O_cornuta	91	4.1	16.81	48.9	2.90898	f
cswr139	warm	O_cornuta	91	4.1	16.81	49.8	2.96252	f
cswr140	warm	O_cornuta	91	4.5	20.25	61.1	3.01728	f
cswr141	warm	O_cornuta	91	4.3	18.49	59.3	3.20714	f
cswr142	warm	O_cornuta	91	4.3	18.49	62.3	3.36939	f
cswr143	warm	O_cornuta	91	4.1	16.81	57.4	3.41463	f
cswr144	warm	O_cornuta	91	4.5	20.25	73.3	3.61975	f
cswr145	warm	O_cornuta	91	3.9	15.21	48.9	3.21499	f
cswr146	warm	O_cornuta	91	4.6	21.16	73.7	3.48299	f
cswr147	warm	O_cornuta	91	4.5	20.25	63.8	3.15062	f
cswe065	warm	O_cornuta	92	4.3	18.49	58.2	3.14765	f
cswe098	warm	O_cornuta	92	4	16	52.1	3.25625	f
cswe080	warm	O_cornuta	92	3.8	14.44	44.4	3.07479	f
cswr148	warm	O_cornuta	92	4.4	19.36	59.7	3.08368	f
cswr149	warm	O_cornuta	92	4.5	20.25	56.3	2.78025	f
cswr150	warm	O_cornuta	92	4.2	17.64	56.42	3.19841	f
cswe007	warm	O_cornuta	93	4.2	17.64	59.1	3.35034	f
cswe088	warm	O_cornuta	93	4.5	20.25	62.6	3.09136	f
cswe029	warm	O_cornuta	93	4.6	21.16	75.1	3.54915	f
cswe052	warm	O_cornuta	93	4.5	20.25	74.4	3.67407	f
cswe092	warm	O_cornuta	93	4.6	21.16	68.2	3.22306	f
cswr151	warm	O_cornuta	93	3.5	12.25	24.7	2.01633	m
cswr152	warm	O_cornuta	93	3.7	13.69	32.3	2.35939	m
cswr153	warm	O_cornuta	93	4.5	20.25	66	3.25926	f
cswr154	warm	O_cornuta	93	4	16	47	2.9375	f
cswr155	warm	O_cornuta	93	4.5	20.25	61.6	3.04198	f
cswr156	warm	O_cornuta	93	4.4	19.36	61.1	3.15599	f
cswr157	warm	O_cornuta	93	4.1	16.81	44.1	2.62344	f
cswe044	warm	O_cornuta	94	4.5	20.25	63.2	3.12099	f
cswr158	warm	O_cornuta	94	4.2	17.64	53.9	3.05556	f
cswr159	warm	O_cornuta	94	4.3	18.49	57.1	3.08816	f
cswe016	warm	O_cornuta	95	4.2	17.64	62.3	3.53175	f
cswe085	warm	O_cornuta	95	4.6	21.16	69.7	3.29395	f
cswe038	warm	O_cornuta	95	4	16	44.2	2.7625	f
cswe048	warm	O_cornuta	95	4.5	20.25	60.2	2.97284	f
cswr160	warm	O_cornuta	95	3.7	13.69	38.6	2.81958	f
cswr161	warm	O_cornuta	95	4	16	50.5	3.15625	f
cswr162	warm	O_cornuta	95	4.5	20.25	65.4	3.22963	f
cswe100	warm	O_cornuta	96	3.6	12.96	34.2	2.63889	f
cswe061	warm	O_cornuta	96	4.3	18.49	52.5	2.83937	f
cswr163	warm	O_cornuta	96	4.4	19.36	65.2	3.36777	f
cswr164	warm	O_cornuta	96	4.8	23.04	76.9	3.33767	f
cswe002	warm	O_cornuta	97	4.5	20.25	60.5	2.98765	f
cswe034	warm	O_cornuta	97	4.2	17.64	54.2	3.07256	f
cswr165	warm	O_cornuta	97	3.9	15.21	38.9	2.55753	f
cswr166	warm	O_cornuta	97	3	9	21.3	2.36667	f
cswr167	warm	O_cornuta	97	4.3	18.49	54.6	2.95295	f
cswe036	warm	O_cornuta	98	4.6	21.16	65.8	3.10964	f
cswr168	warm	O_cornuta	98	4.3	18.49	62.6	3.38561	f
cswe081	warm	O_cornuta	99	3.4	11.56	29.3	2.5346	f
cswe091	warm	O_cornuta	120	3.6	12.96	25	1.92901	f
rswe062	warm	O_rufa	92	3.2	10.24	22.2	2.16797	m
rswr001	warm	O_rufa	92	3.4	11.56	31.8	2.75087	m
rswr002	warm	O_rufa	94	3.3	10.89	31.4	2.88338	m
rswr003	warm	O_rufa	94	3.3	10.89	31.8	2.92011	m
rswr004	warm	O_rufa	94	3.6	12.96	36.4	2.80864	m
rswr005	warm	O_rufa	94	3.3	10.89	28.7	2.63545	m
rswe034	warm	O_rufa	95	2.7	7.29	14.4	1.97531	m
rswr006	warm	O_rufa	95	3.3	10.89	32.7	3.00275	m
rswr007	warm	O_rufa	95	3.1	9.61	23	2.39334	m
rswr008	warm	O_rufa	95	3.4	11.56	30.8	2.66436	m
rswr009	warm	O_rufa	95	3.5	12.25	34.2	2.79184	m
rswr010	warm	O_rufa	95	3.1	9.61	22.7	2.36212	m
rswr011	warm	O_rufa	95	3.2	10.24	21.6	2.10937	m
rswe019	warm	O_rufa	96	3.6	12.96	33.3	2.56944	m
rswe021	warm	O_rufa	96	3.7	13.69	38.7	2.82688	m
rswe023	warm	O_rufa	96	3.5	12.25	34.8	2.84082	m
rswe070	warm	O_rufa	96	3.3	10.89	25.3	2.32323	m
rswe095	warm	O_rufa	96	2.9	8.41	19.2	2.283	m
rswe088	warm	O_rufa	96	3.4	11.56	26.1	2.25779	m
rswr012	warm	O_rufa	96	3.6	12.96	36.3	2.80093	m
rswr013	warm	O_rufa	96	3.2	10.24	27.4	2.67578	m
rswr014	warm	O_rufa	96	3.2	10.24	24.8	2.42187	m
rswr015	warm	O_rufa	96	3	9	23.4	2.6	m
rswr016	warm	O_rufa	96	3.5	12.25	31.5	2.57143	m
rswr017	warm	O_rufa	96	3.2	10.24	27.5	2.68555	m
rswr018	warm	O_rufa	96	3.3	10.89	27.9	2.56198	m
rswr019	warm	O_rufa	96	3	9	21.8	2.42222	m
rswr020	warm	O_rufa	96	3.5	12.25	32.2	2.62857	m
rswr021	warm	O_rufa	96	3.7	13.69	42.1	3.07524	m
rswr022	warm	O_rufa	96	3.6	12.96	40	3.08642	m
rswr023	warm	O_rufa	96	3.3	10.89	29.5	2.70891	m
rswr024	warm	O_rufa	96	3.4	11.56	27.9	2.41349	m
rswr025	warm	O_rufa	96	3.1	9.61	26.4	2.74714	m
rswe039	warm	O_rufa	97	3.5	12.25	31	2.53061	m
rswe047	warm	O_rufa	97	3.5	12.25	35.8	2.92245	m
rswe074	warm	O_rufa	97	3.5	12.25	36.9	3.01224	m
rswe056	warm	O_rufa	97	3.3	10.89	25.1	2.30487	m
rswe068	warm	O_rufa	97	3.3	10.89	29.7	2.72727	m
rswr026	warm	O_rufa	97	3.5	12.25	28.4	2.31837	m
rswr027	warm	O_rufa	97	3.2	10.24	22.4	2.1875	m
rswr028	warm	O_rufa	97	3	9	18	2	m
rswr029	warm	O_rufa	97	3.4	11.56	29.1	2.5173	m
rswr030	warm	O_rufa	97	3.6	12.96	34	2.62346	m
rswr031	warm	O_rufa	97	3.3	10.89	31.6	2.90174	m
rswr032	warm	O_rufa	97	3.3	10.89	30.2	2.77319	m
rswr033	warm	O_rufa	97	3.4	11.56	29.7	2.5692	m
rswe100	warm	O_rufa	98	3.3	10.89	30.5	2.80073	m
rswe063	warm	O_rufa	98	3.2	10.24	26	2.53906	m
rswe090	warm	O_rufa	98	3.6	12.96	36.9	2.84722	m
rswe020	warm	O_rufa	98	3.4	11.56	35.2	3.04498	m
rswe031	warm	O_rufa	98	3.2	10.24	28.1	2.74414	m
rswe015	warm	O_rufa	98	3.3	10.89	29.4	2.69972	m
rswr034	warm	O_rufa	98	3.4	11.56	29.7	2.5692	m
rswr035	warm	O_rufa	98	3.4	11.56	31.9	2.75952	m
rswr036	warm	O_rufa	98	3.4	11.56	27.4	2.37024	m
rswr037	warm	O_rufa	98	3.4	11.56	29.3	2.5346	m
rswr038	warm	O_rufa	98	3.4	11.56	30	2.59516	m
rswr039	warm	O_rufa	98	3.8	14.44	46.9	3.24792	m
rswr040	warm	O_rufa	98	2.9	8.41	19	2.25922	m
rswr041	warm	O_rufa	98	3.4	11.56	27	2.33564	m
rswr042	warm	O_rufa	98	3.2	10.24	27.4	2.67578	m
rswr043	warm	O_rufa	98	3.4	11.56	28.8	2.49135	m
rswr044	warm	O_rufa	98	3.5	12.25	32.1	2.62041	m
rswr045	warm	O_rufa	98	3.3	10.89	29.4	2.69972	m
rswr046	warm	O_rufa	98	3.4	11.56	31.4	2.71626	m
rswe049	warm	O_rufa	99	3.5	12.25	33.2	2.7102	m
rswe008	warm	O_rufa	99	3.2	10.24	25.1	2.45117	m
rswr047	warm	O_rufa	100	3.4	11.56	27.4	2.37024	m
rswr048	warm	O_rufa	100	3.3	10.89	27.3	2.50689	m
rswr049	warm	O_rufa	100	3.4	11.56	28.7	2.4827	m
rswr050	warm	O_rufa	100	3.6	12.96	31.8	2.4537	m
rswr051	warm	O_rufa	100	3.1	9.61	24	2.4974	m
rswr052	warm	O_rufa	100	3.2	10.24	22.3	2.17773	m
rswe022	warm	O_rufa	101	3.6	12.96	36.6	2.82407	m
rswe010	warm	O_rufa	101	3.3	10.89	28.5	2.61708	m
rswe004	warm	O_rufa	101	3.5	12.25	31	2.53061	m
rswr053	warm	O_rufa	101	3.4	11.56	30.9	2.67301	m
rswr054	warm	O_rufa	101	3.4	11.56	25.9	2.24048	m
rswr055	warm	O_rufa	101	3.3	10.89	23.3	2.13958	m
rswr056	warm	O_rufa	101	3	9	17.4	1.93333	m
rswr057	warm	O_rufa	101	3.3	10.89	27.7	2.54362	m
rswr058	warm	O_rufa	101	3.6	12.96	29.3	2.2608	m
rswe006	warm	O_rufa	102	3.4	11.56	30	2.59516	m
rswe017	warm	O_rufa	102	3.3	10.89	27.4	2.51607	m
rswr059	warm	O_rufa	102	3.3	10.89	26.8	2.46097	m
rswr060	warm	O_rufa	102	3.4	11.56	27.6	2.38754	m
rswr061	warm	O_rufa	102	3.2	10.24	29.1	2.8418	m
rswe035	warm	O_rufa	103	3.7	13.69	32.7	2.3886	m
rswr062	warm	O_rufa	103	3.5	12.25	28	2.28571	m
rswr063	warm	O_rufa	103	3	9	17.8	1.97778	m
rswe076	warm	O_rufa	104	3.8	14.44	41.9	2.90166	m
rswr064	warm	O_rufa	104	3.3	10.89	28.5	2.61708	m
rswr065	warm	O_rufa	104	3.1	9.61	23.3	2.42456	m
rswr066	warm	O_rufa	104	2.9	8.41	19.6	2.33056	m
rswr067	warm	O_rufa	104	3.1	9.61	21.6	2.24766	m
rswr068	warm	O_rufa	105	3.3	10.89	25.3	2.32323	m
rswr069	warm	O_rufa	105	2.9	8.41	16.7	1.98573	m
rswr070	warm	O_rufa	105	3	9	20.4	2.26667	m
rswe036	warm	O_rufa	106	3.2	10.24	27.5	2.68555	m
rswr071	warm	O_rufa	106	3.4	11.56	29.1	2.5173	m
rswr072	warm	O_rufa	106	3	9	15.9	1.76667	m
rswr073	warm	O_rufa	106	3.6	12.96	32.8	2.53086	m
rswr074	warm	O_rufa	106	3.8	14.44	40.8	2.82548	m
rswr075	warm	O_rufa	106	3.4	11.56	28.7	2.4827	m
rswr076	warm	O_rufa	107	3.4	11.56	27.6	2.38754	m
rswr077	warm	O_rufa	107	3.4	11.56	29.9	2.58651	m
rswr078	warm	O_rufa	108	3.2	10.24	23.5	2.29492	m
rswr079	warm	O_rufa	108	3.6	12.96	37.3	2.87809	m
rswr080	warm	O_rufa	109	3.3	10.89	33	3.0303	m
rswr081	warm	O_rufa	109	3.2	10.24	21	2.05078	m
rswe098	warm	O_rufa	109	3.3	10.89	27.3	2.50689	m
rswe091	warm	O_rufa	109	3.3	10.89	23.5	2.15794	m
rswe099	warm	O_rufa	109	3.3	10.89	24.2	2.22222	m
rswe025	warm	O_rufa	109	3.4	11.56	28.8	2.49135	m
rswe027	warm	O_rufa	110	3.6	12.96	34	2.62346	m
rswr082	warm	O_rufa	110	3.2	10.24	22.6	2.20703	m
rswr083	warm	O_rufa	110	3.3	10.89	29.3	2.69054	m
rswr084	warm	O_rufa	110	3.2	10.24	27.2	2.65625	m
rswr085	warm	O_rufa	111	3.7	13.69	38.4	2.80497	m
rswe097	warm	O_rufa	112	3.4	11.56	28.8	2.49135	f
rswr086	warm	O_rufa	112	4.1	16.81	51.3	3.05175	f
rswr087	warm	O_rufa	114	3	9	19.4	2.15556	m
rswr088	warm	O_rufa	115	3.8	14.44	45.9	3.17867	f
rswr089	warm	O_rufa	115	3.8	14.44	43.5	3.01247	f
rswe061	warm	O_rufa	116	3.4	11.56	29.6	2.56055	f
rswr090	warm	O_rufa	116	3.9	15.21	49.8	3.27416	f
rswr091	warm	O_rufa	116	3.6	12.96	34.3	2.6466	f
rswe003	warm	O_rufa	117	3.9	15.21	45.1	2.96515	f
rswr092	warm	O_rufa	117	3.6	12.96	31.4	2.42284	f
rswr093	warm	O_rufa	117	3.7	13.69	37.1	2.71001	f
rswe016	warm	O_rufa	118	3.9	15.21	44.8	2.94543	f
rswe041	warm	O_rufa	118	3.6	12.96	36.1	2.78549	f
rswe087	warm	O_rufa	118	3.9	15.21	44.6	2.93228	f
rswe085	warm	O_rufa	118	3.8	14.44	35.5	2.45845	f
rswr094	warm	O_rufa	118	3.8	14.44	38.5	2.6662	f
rswr095	warm	O_rufa	118	3.9	15.21	41.6	2.73504	f
rswr096	warm	O_rufa	118	4	16	46.8	2.925	f
rswe065	warm	O_rufa	119	4.1	16.81	40.9	2.43308	f
rswe032	warm	O_rufa	119	3.2	10.24	26.3	2.56836	f
rswe028	warm	O_rufa	119	3.9	15.21	44.7	2.93886	f
rswe009	warm	O_rufa	119	3.9	15.21	42.3	2.78107	f
rswr097	warm	O_rufa	119	4.1	16.81	41.6	2.47472	f
rswr098	warm	O_rufa	119	3.8	14.44	34.6	2.39612	f
rswe044	warm	O_rufa	120	3.9	15.21	40.9	2.68902	f
rswe045	warm	O_rufa	120	4	16	40.9	2.55625	f
rswe011	warm	O_rufa	120	3.7	13.69	36.9	2.6954	f
rswe050	warm	O_rufa	120	3.7	13.69	41.1	3.00219	f
rswe026	warm	O_rufa	120	3.7	13.69	36.9	2.6954	f
rswe029	warm	O_rufa	120	4	16	44.9	2.80625	f
rswe042	warm	O_rufa	120	3.8	14.44	33.2	2.29917	f
rswe014	warm	O_rufa	120	3.5	12.25	32.5	2.65306	f
rswe048	warm	O_rufa	120	3.7	13.69	38.4	2.80497	f
rswe030	warm	O_rufa	120	4.1	16.81	47	2.79595	f
rswe037	warm	O_rufa	120	3.9	15.21	40.4	2.65615	f
rswe096	warm	O_rufa	120	3.2	10.24	21.6	2.10937	f
rswe083	warm	O_rufa	120	3.4	11.56	33.8	2.92388	f
rswe089	warm	O_rufa	120	3.4	11.56	24.9	2.15398	f
rswe064	warm	O_rufa	120	3.7	13.69	33.1	2.41782	f
rswe094	warm	O_rufa	120	4	16	45.9	2.86875	f
rswe093	warm	O_rufa	120	4	16	44.5	2.78125	f
rswe078	warm	O_rufa	120	4.3	18.49	55.1	2.97999	f
rswe077	warm	O_rufa	120	3.9	15.21	44.1	2.89941	f
rswe012	warm	O_rufa	120	3.6	12.96	36.8	2.83951	f
rswe024	warm	O_rufa	120	3.5	12.25	25.4	2.07347	f
rswe001	warm	O_rufa	120	4.2	17.64	48.6	2.7551	f
rswe005	warm	O_rufa	120	3.9	15.21	50.1	3.29389	f
rswe059	warm	O_rufa	120	4.3	18.49	52.5	2.83937	f
rswe084	warm	O_rufa	120	4	16	41.3	2.58125	f
rswe080	warm	O_rufa	120	3.7	13.69	38.4	2.80497	f
rswe081	warm	O_rufa	120	3.4	11.56	29.9	2.58651	f
rswe082	warm	O_rufa	120	4	16	42.3	2.64375	f
rswe066	warm	O_rufa	120	3.2	10.24	26.1	2.54883	f
rswe067	warm	O_rufa	120	3.6	12.96	34.8	2.68519	f
rswe069	warm	O_rufa	120	3.9	15.21	36.7	2.41289	f
rswe054	warm	O_rufa	120	4.2	17.64	48.3	2.7381	f
rswe057	warm	O_rufa	120	3.6	12.96	35	2.70062	f
rswe053	warm	O_rufa	120	3.9	15.21	41.4	2.72189	f
rswe055	warm	O_rufa	120	4	16	40.8	2.55	f
rswe073	warm	O_rufa	120	3.4	11.56	27.9	2.41349	f
rswe060	warm	O_rufa	120	3.8	14.44	41.5	2.87396	f
rswe072	warm	O_rufa	120	3.8	14.44	38.7	2.68006	f
rswr099	warm	O_rufa	120	4	16	45	2.8125	f
rswr100	warm	O_rufa	120	3.6	12.96	37.7	2.90895	f
rswr101	warm	O_rufa	120	4	16	38.8	2.425	f
rswr102	warm	O_rufa	120	3.6	12.96	31.8	2.4537	f
rswr103	warm	O_rufa	120	3.7	13.69	33.6	2.45435	f
rswr104	warm	O_rufa	120	3.9	15.21	36.7	2.41289	f
rswr105	warm	O_rufa	120	3.9	15.21	41.2	2.70874	f
rswr106	warm	O_rufa	120	3.4	11.56	30.3	2.62111	f
rswr107	warm	O_rufa	120	3.7	13.69	29.8	2.17677	f
rswr108	warm	O_rufa	120	3.9	15.21	44	2.89283	f
rswr109	warm	O_rufa	120	4.1	16.81	45.2	2.68888	f
rswr110	warm	O_rufa	120	4	16	46.1	2.88125	f
rswr111	warm	O_rufa	120	3.6	12.96	39.2	3.02469	f
rswr112	warm	O_rufa	120	3.9	15.21	42.8	2.81394	f
rswr113	warm	O_rufa	120	3.6	12.96	28.8	2.22222	f
rswr114	warm	O_rufa	120	2.8	7.84	22.7	2.89541	f
rswr115	warm	O_rufa	120	4.1	16.81	47.9	2.84949	f
rswr116	warm	O_rufa	120	3.5	12.25	32.2	2.62857	f
rswr117	warm	O_rufa	120	3.7	13.69	35.2	2.57122	f
rswr118	warm	O_rufa	120	4.1	16.81	49	2.91493	f
rswr119	warm	O_rufa	120	3.6	12.96	29.7	2.29167	f
rswr120	warm	O_rufa	120	3.4	11.56	32.9	2.84602	f
rswr121	warm	O_rufa	120	3.2	10.24	26.6	2.59766	f
rswr122	warm	O_rufa	120	3.9	15.21	40.4	2.65615	f
rswr123	warm	O_rufa	120	3.7	13.69	36.1	2.63696	f
rswr124	warm	O_rufa	120	4.2	17.64	48.9	2.77211	f
rswr125	warm	O_rufa	120	3	9	22.1	2.45556	f
rswr126	warm	O_rufa	120	3.5	12.25	35.2	2.87347	f
rswr127	warm	O_rufa	120	3.9	15.21	42.7	2.80736	f
rswr128	warm	O_rufa	120	4	16	51.4	3.2125	f
rswr129	warm	O_rufa	120	4.3	18.49	50.7	2.74202	f
rswr130	warm	O_rufa	120	3.5	12.25	37.1	3.02857	f
rswr131	warm	O_rufa	120	3.7	13.69	39.3	2.87071	f
rswr132	warm	O_rufa	120	4	16	35.5	2.21875	f
rswr133	warm	O_rufa	120	3.5	12.25	36.4	2.97143	f
rswr134	warm	O_rufa	120	4	16	43.6	2.725	f
rswr135	warm	O_rufa	120	4	16	47	2.9375	f
rswr136	warm	O_rufa	120	4	16	42.7	2.66875	f
rswr137	warm	O_rufa	120	4	16	39.7	2.48125	f
rswr138	warm	O_rufa	120	3.7	13.69	36.6	2.67348	f
rswr139	warm	O_rufa	120	3.5	12.25	30.1	2.45714	f
rswr140	warm	O_rufa	120	3.9	15.21	40.3	2.64957	f
rswr141	warm	O_rufa	120	3.6	12.96	28.8	2.22222	f
rswr142	warm	O_rufa	120	3.4	11.56	29	2.50865	f
rswr143	warm	O_rufa	120	3.9	15.21	39.3	2.58383	f
rswr144	warm	O_rufa	120	3.9	15.21	46.9	3.0835	f
rswr145	warm	O_rufa	120	3.6	12.96	31.2	2.40741	f
rswr146	warm	O_rufa	120	3.2	10.24	23.2	2.26562	f
rswr147	warm	O_rufa	120	3.3	10.89	26.3	2.41506	f
rswr148	warm	O_rufa	120	3.4	11.56	31.1	2.69031	f
rswr149	warm	O_rufa	120	4	16	44.2	2.7625	f
rswr150	warm	O_rufa	120	3.9	15.21	40.5	2.66272	f
rswr151	warm	O_rufa	120	4.3	18.49	47.7	2.57977	f
rswr152	warm	O_rufa	120	3.9	15.21	40	2.62985	f
rswr153	warm	O_rufa	120	3.7	13.69	31	2.26443	f
rswr154	warm	O_rufa	120	3.6	12.96	34.4	2.65432	f
rswr155	warm	O_rufa	120	3.1	9.61	19.6	2.03954	f
rswr156	warm	O_rufa	120	3.6	12.96	32.9	2.53858	f
rswr157	warm	O_rufa	120	3	9	22.1	2.45556	f
rswr158	warm	O_rufa	120	3.6	12.96	38.5	2.97068	f
rswr159	warm	O_rufa	120	3.5	12.25	33.5	2.73469	f
rswr160	warm	O_rufa	120	3.2	10.24	27.8	2.71484	f
rswr161	warm	O_rufa	120	3.6	12.96	38.2	2.94753	f
rswr162	warm	O_rufa	120	3.2	10.24	36	3.51562	f
rswr163	warm	O_rufa	120	4	16	45	2.8125	f
rswr164	warm	O_rufa	120	3.7	13.69	37	2.7027	f
rswr165	warm	O_rufa	120	3.9	15.21	38.6	2.5378	f
rswr166	warm	O_rufa	120	3.5	12.25	24.9	2.03265	f
rswr167	warm	O_rufa	120	3.3	10.89	29.9	2.74564	f
rswr168	warm	O_rufa	120	2.9	8.41	24.7	2.93698	f
rswr169	warm	O_rufa	120	3.6	12.96	32.7	2.52315	f
rswr170	warm	O_rufa	120	3.3	10.89	28.2	2.58953	f
rswr171	warm	O_rufa	120	4	16	48.9	3.05625	f
rswr172	warm	O_rufa	120	3.9	15.21	43.2	2.84024	f
rswr173	warm	O_rufa	120	3.8	14.44	35.9	2.48615	f
rswr174	warm	O_rufa	120	3.9	15.21	36.8	2.41946	f
rswr175	warm	O_rufa	120	3.1	9.61	30.2	3.14256	f
rswr176	warm	O_rufa	120	4	16	44.6	2.7875	f
rswr177	warm	O_rufa	120	3.5	12.25	32.9	2.68571	f
rswr178	warm	O_rufa	120	4	16	47.8	2.9875	f
rswr179	warm	O_rufa	120	3.5	12.25	37.3	3.0449	f
rswr180	warm	O_rufa	120	2.9	8.41	23.4	2.7824	f
rswe013	warm	O_rufa	121	3.7	13.69	38.8	2.83419	f
rswe052	warm	O_rufa	121	3.4	11.56	32.4	2.80277	f
rswr181	warm	O_rufa	121	4	16	55.2	3.45	f
rswr182	warm	O_rufa	121	3.8	14.44	36.4	2.52078	f
rswr183	warm	O_rufa	121	3.7	13.69	33.3	2.43243	f
rswr184	warm	O_rufa	121	4	16	45.9	2.86875	f
rswr185	warm	O_rufa	121	3.7	13.69	37.8	2.76114	f
rswr186	warm	O_rufa	121	4.1	16.81	43.9	2.61154	f
rswr187	warm	O_rufa	121	4	16	44.4	2.775	f
rswr188	warm	O_rufa	122	3.7	13.69	36.1	2.63696	f
rswr189	warm	O_rufa	126	4	16	37.7	2.35625	f
rswe051	warm	O_rufa	127	4	16	39.4	2.4625	f
rswe007	warm	O_rufa	129	3.7	13.69	32.9	2.40321	f
csme076	medium	O_cornuta	90	3.6	12.96	32.2	2.48457	m
csme085	medium	O_cornuta	90	3.6	12.96	35.9	2.77006	m
csme041	medium	O_cornuta	90	3.8	14.44	39.7	2.74931	m
csme013	medium	O_cornuta	90	3.7	13.69	35.5	2.59313	m
csme001	medium	O_cornuta	90	3.7	13.69	40.2	2.93645	m
csme091	medium	O_cornuta	90	3.6	12.96	35.3	2.72377	m
csme028	medium	O_cornuta	90	4.1	16.81	48.2	2.86734	m
csme006	medium	O_cornuta	90	3.6	12.96	33.3	2.56944	m
csme010	medium	O_cornuta	90	3.6	12.96	32.4	2.5	m
csme082	medium	O_cornuta	90	3.7	13.69	37.4	2.73192	m
csme080	medium	O_cornuta	90	3.5	12.25	29.6	2.41633	m
csme040	medium	O_cornuta	90	3.6	12.96	34.1	2.63117	m
csme044	medium	O_cornuta	90	4.1	16.81	53.1	3.15883	m
csme081	medium	O_cornuta	90	3.6	12.96	32.6	2.51543	m
csme012	medium	O_cornuta	90	4	16	42.2	2.6375	m
csme089	medium	O_cornuta	90	3.7	13.69	38.4	2.80497	m
csme087	medium	O_cornuta	90	3.6	12.96	36.6	2.82407	m
csme090	medium	O_cornuta	90	4	16	50.3	3.14375	m
csme024	medium	O_cornuta	90	3.7	13.69	36	2.62966	m
csme008	medium	O_cornuta	90	3.6	12.96	31.9	2.46142	m
csme064	medium	O_cornuta	90	3.7	13.69	40.5	2.95836	m
csme074	medium	O_cornuta	90	4.3	18.49	52.4	2.83396	f
csme077	medium	O_cornuta	90	3.5	12.25	31.4	2.56327	m
csme035	medium	O_cornuta	90	3.6	12.96	36.5	2.81636	m
csme066	medium	O_cornuta	90	3.5	12.25	32.2	2.62857	m
csme063	medium	O_cornuta	90	3.7	13.69	36.5	2.66618	m
csmr001	medium	O_cornuta	90	3.6	12.96	38.2	2.94753	m
csmr002	medium	O_cornuta	90	3.8	14.44	39.9	2.76316	m
csmr003	medium	O_cornuta	90	3.5	12.25	36.4	2.97143	m
csmr004	medium	O_cornuta	90	3.7	13.69	35.3	2.57852	m
csmr005	medium	O_cornuta	90	3.7	13.69	38.6	2.81958	m
csmr006	medium	O_cornuta	90	3.6	12.96	34.4	2.65432	m
csmr007	medium	O_cornuta	90	3.8	14.44	40.8	2.82548	m
csmr008	medium	O_cornuta	90	3.6	12.96	33.9	2.61574	m
csmr009	medium	O_cornuta	90	3.8	14.44	42.9	2.97091	m
csmr010	medium	O_cornuta	90	3.4	11.56	31.7	2.74221	m
csmr011	medium	O_cornuta	90	3.5	12.25	36.9	3.01224	m
csmr012	medium	O_cornuta	90	3.6	12.96	35	2.70062	m
csmr013	medium	O_cornuta	90	3.5	12.25	27.3	2.22857	m
csmr014	medium	O_cornuta	90	3.6	12.96	36.5	2.81636	m
csmr015	medium	O_cornuta	90	3.4	11.56	32	2.76817	m
csmr016	medium	O_cornuta	90	3.6	12.96	32.5	2.50772	m
csmr017	medium	O_cornuta	90	3.9	15.21	50.5	3.32018	m
csmr018	medium	O_cornuta	90	3.4	11.56	31.7	2.74221	m
csmr019	medium	O_cornuta	90	3.5	12.25	32.4	2.6449	m
csmr020	medium	O_cornuta	90	3.6	12.96	33.9	2.61574	m
csmr021	medium	O_cornuta	90	3.6	12.96	35.3	2.72377	m
csmr022	medium	O_cornuta	90	3.9	15.21	42.4	2.78764	m
csmr023	medium	O_cornuta	90	3.5	12.25	28.1	2.29388	m
csmr024	medium	O_cornuta	90	3.4	11.56	28.5	2.4654	m
csmr025	medium	O_cornuta	90	3.8	14.44	42.5	2.94321	m
csmr026	medium	O_cornuta	90	3.8	14.44	42.6	2.95014	m
csmr027	medium	O_cornuta	90	3.9	15.21	47.4	3.11637	m
csmr028	medium	O_cornuta	90	3.6	12.96	32.7	2.52315	m
csmr029	medium	O_cornuta	90	3.7	13.69	39.4	2.87801	m
csmr030	medium	O_cornuta	90	3.8	14.44	35	2.42382	m
csmr031	medium	O_cornuta	90	3.4	11.56	30.3	2.62111	m
csmr032	medium	O_cornuta	90	3.8	14.44	38.3	2.65235	m
csmr033	medium	O_cornuta	90	3.6	12.96	34	2.62346	m
csmr034	medium	O_cornuta	90	3.7	13.69	38.8	2.83419	m
csmr035	medium	O_cornuta	90	3.7	13.69	39.7	2.89993	m
csmr036	medium	O_cornuta	90	3.4	11.56	28.7	2.4827	m
csmr037	medium	O_cornuta	90	3.7	13.69	37.9	2.76844	m
csmr038	medium	O_cornuta	90	3.3	10.89	25.2	2.31405	m
csmr039	medium	O_cornuta	90	3.6	12.96	38.3	2.95525	m
csmr040	medium	O_cornuta	90	3.4	11.56	30.2	2.61246	m
csmr041	medium	O_cornuta	90	4.1	16.81	50.5	3.00416	m
csmr042	medium	O_cornuta	90	3.4	11.56	29.7	2.5692	m
csmr043	medium	O_cornuta	90	3.2	10.24	29.1	2.8418	m
csmr044	medium	O_cornuta	90	3.6	12.96	31.4	2.42284	m
csmr045	medium	O_cornuta	90	3.5	12.25	33.3	2.71837	m
csmr046	medium	O_cornuta	90	3.7	13.69	37	2.7027	m
csmr047	medium	O_cornuta	90	3.7	13.69	38.4	2.80497	m
csmr048	medium	O_cornuta	90	3.6	12.96	35.3	2.72377	m
csmr049	medium	O_cornuta	90	3.5	12.25	30	2.44898	m
csmr050	medium	O_cornuta	90	3.9	15.21	41.7	2.74162	m
csmr051	medium	O_cornuta	90	3.9	15.21	44.1	2.89941	m
csmr052	medium	O_cornuta	90	4.4	19.36	57.7	2.98037	f
csme061	medium	O_cornuta	91	3.5	12.25	32.9	2.68571	m
csme062	medium	O_cornuta	91	3.4	11.56	28.8	2.49135	m
csme096	medium	O_cornuta	91	3.7	13.69	39.9	2.91454	m
csme092	medium	O_cornuta	91	3.7	13.69	36	2.62966	m
csme092_2	medium	O_cornuta	91	3.5	12.25	32.8	2.67755	m
csme099	medium	O_cornuta	91	3.7	13.69	41.7	3.04602	m
csme004	medium	O_cornuta	91	3.6	12.96	38.2	2.94753	m
csmr053	medium	O_cornuta	91	3.5	12.25	33.4	2.72653	m
csmr054	medium	O_cornuta	91	3.9	15.21	50.8	3.33991	m
csmr055	medium	O_cornuta	91	3.7	13.69	34.3	2.50548	m
csmr056	medium	O_cornuta	91	3.4	11.56	29.7	2.5692	m
csmr057	medium	O_cornuta	91	3.7	13.69	34	2.48356	m
csmr058	medium	O_cornuta	91	3.4	11.56	29.2	2.52595	m
csmr059	medium	O_cornuta	91	3.7	13.69	36.4	2.65888	m
csmr060	medium	O_cornuta	91	3.6	12.96	35.3	2.72377	m
csmr061	medium	O_cornuta	91	3.3	10.89	25.6	2.35078	m
csmr062	medium	O_cornuta	91	3.6	12.96	38.3	2.95525	m
csmr063	medium	O_cornuta	91	3.8	14.44	36.2	2.50693	m
csmr064	medium	O_cornuta	91	3.6	12.96	34	2.62346	m
csmr065	medium	O_cornuta	91	3.8	14.44	42	2.90859	m
csme075	medium	O_cornuta	92	3.9	15.21	41.6	2.73504	m
csme027	medium	O_cornuta	92	3.4	11.56	30.2	2.61246	m
csme042	medium	O_cornuta	92	3.4	11.56	28.4	2.45675	m
csme030	medium	O_cornuta	92	3.7	13.69	40.8	2.98028	m
csme050	medium	O_cornuta	92	3.8	14.44	44.9	3.10942	m
csme045	medium	O_cornuta	92	3.8	14.44	47.8	3.31025	m
csme037	medium	O_cornuta	92	3.7	13.69	32.2	2.35208	m
csmr066	medium	O_cornuta	92	3.5	12.25	26.5	2.16327	m
csmr067	medium	O_cornuta	92	4.1	16.81	51	3.03391	m
csmr068	medium	O_cornuta	92	3.7	13.69	41.2	3.0095	m
csme095	medium	O_cornuta	93	3.5	12.25	33.3	2.71837	m
csme055	medium	O_cornuta	93	3.5	12.25	31.7	2.58776	m
csme056	medium	O_cornuta	93	3.5	12.25	29.4	2.4	m
csme026	medium	O_cornuta	93	3.8	14.44	38.8	2.68698	m
csmr069	medium	O_cornuta	93	4.7	22.09	74.2	3.35899	f
csmr070	medium	O_cornuta	93	4.5	20.25	64.6	3.19012	f
csmr071	medium	O_cornuta	93	4.5	20.25	74.9	3.69877	m
csmr072	medium	O_cornuta	93	3.4	11.56	28.7	2.4827	m
csmr073	medium	O_cornuta	93	3.2	10.24	24.3	2.37305	m
csmr074	medium	O_cornuta	93	3.7	13.69	37	2.7027	m
csmr075	medium	O_cornuta	93	3.5	12.25	30.4	2.48163	m
csmr076	medium	O_cornuta	93	3.9	15.21	41.2	2.70874	m
csmr077	medium	O_cornuta	93	3.4	11.56	32.5	2.81142	m
csmr078	medium	O_cornuta	93	3.8	14.44	39.1	2.70776	m
csmr079	medium	O_cornuta	93	3.6	12.96	35.2	2.71605	m
csmr080	medium	O_cornuta	93	3.8	14.44	33.2	2.29917	m
csmr081	medium	O_cornuta	93	3.5	12.25	31.3	2.5551	m
csmr082	medium	O_cornuta	93	3.2	10.24	26.3	2.56836	m
csmr083	medium	O_cornuta	93	3.8	14.44	41.4	2.86704	m
csmr084	medium	O_cornuta	93	3.7	13.69	36.9	2.6954	m
csme071	medium	O_cornuta	94	3.5	12.25	31.2	2.54694	m
csme018	medium	O_cornuta	94	3.8	14.44	36.4	2.52078	m
csmr085	medium	O_cornuta	94	4.3	18.49	58.8	3.1801	f
csmr086	medium	O_cornuta	94	3.6	12.96	34.7	2.67747	m
csmr087	medium	O_cornuta	94	4.2	17.64	58.5	3.31633	f
csmr088	medium	O_cornuta	94	4.5	20.25	64.9	3.20494	f
csmr089	medium	O_cornuta	94	3.7	13.69	34.8	2.542	m
csmr090	medium	O_cornuta	94	3.4	11.56	28.5	2.4654	m
csmr091	medium	O_cornuta	94	4.5	20.25	66.8	3.29877	f
csmr092	medium	O_cornuta	94	4.2	17.64	58.5	3.31633	f
csme098	medium	O_cornuta	95	3.7	13.69	34.8	2.542	m
csmr093	medium	O_cornuta	95	4.2	17.64	58.4	3.31066	f
csmr094	medium	O_cornuta	95	3.7	13.69	35.7	2.60774	m
csmr095	medium	O_cornuta	95	4	16	47.1	2.94375	f
csmr096	medium	O_cornuta	95	3.7	13.69	34.9	2.54931	m
csmr097	medium	O_cornuta	95	3.8	14.44	37.8	2.61773	m
csmr098	medium	O_cornuta	95	3.6	12.96	36.1	2.78549	m
csmr099	medium	O_cornuta	95	3.6	12.96	35.8	2.76235	m
csmr100	medium	O_cornuta	95	3.4	11.56	27.1	2.34429	m
csme070	medium	O_cornuta	96	3.8	14.44	36.3	2.51385	m
csme093	medium	O_cornuta	96	3.8	14.44	38.5	2.6662	m
csme011	medium	O_cornuta	96	3.5	12.25	29.4	2.4	m
csme049	medium	O_cornuta	96	4.2	17.64	55.3	3.13492	f
csme025	medium	O_cornuta	96	3.8	14.44	37.7	2.6108	m
csmr101	medium	O_cornuta	96	4.3	18.49	60.9	3.29367	f
csmr102	medium	O_cornuta	96	4.2	17.64	59	3.34467	f
csme058	medium	O_cornuta	97	3.6	12.96	35.9	2.77006	m
csme048	medium	O_cornuta	97	4.6	21.16	71.2	3.36484	f
csmr103	medium	O_cornuta	97	3.9	15.21	41.4	2.72189	m
csmr104	medium	O_cornuta	97	3.6	12.96	31.2	2.40741	m
csmr105	medium	O_cornuta	97	4.5	20.25	77.6	3.8321	f
csmr106	medium	O_cornuta	97	3.9	15.21	41.7	2.74162	f
csmr107	medium	O_cornuta	97	3.9	15.21	43.8	2.87968	m
csme051	medium	O_cornuta	98	3.6	12.96	40.4	3.11728	m
csme020	medium	O_cornuta	98	4	16	51.7	3.23125	f
csme005	medium	O_cornuta	98	4.5	20.25	69.6	3.43704	f
csme029	medium	O_cornuta	98	4.6	21.16	68.9	3.25614	f
csmr108	medium	O_cornuta	98	4.1	16.81	51.5	3.06365	f
csmr109	medium	O_cornuta	98	3.3	10.89	27.4	2.51607	m
csmr110	medium	O_cornuta	99	4.5	20.25	71.6	3.5358	f
csme043	medium	O_cornuta	100	4.2	17.64	57.1	3.23696	f
csme036	medium	O_cornuta	100	4.2	17.64	55.9	3.16893	f
csme078	medium	O_cornuta	100	3.7	13.69	32.3	2.35939	m
csmr111	medium	O_cornuta	100	4.1	16.81	50.8	3.02201	f
csmr112	medium	O_cornuta	100	4.4	19.36	60	3.09917	f
csmr113	medium	O_cornuta	100	4.5	20.25	67.2	3.31852	f
csmr114	medium	O_cornuta	100	4.2	17.64	53.3	3.02154	f
csmr115	medium	O_cornuta	100	4.1	16.81	55.1	3.27781	f
csmr116	medium	O_cornuta	100	4.7	22.09	75.9	3.43594	f
csmr117	medium	O_cornuta	100	4.2	17.64	56.3	3.19161	f
csme002	medium	O_cornuta	101	4.2	17.64	52.1	2.95351	f
csmr118	medium	O_cornuta	101	4.4	19.36	64.3	3.32128	f
csmr119	medium	O_cornuta	101	4.3	18.49	58.7	3.17469	f
csmr120	medium	O_cornuta	101	4.6	21.16	71.9	3.39792	f
csmr121	medium	O_cornuta	101	3.4	11.56	27.8	2.40484	m
csmr122	medium	O_cornuta	101	4	16	52.7	3.29375	f
csme039	medium	O_cornuta	102	4.2	17.64	54.1	3.06689	f
csme084	medium	O_cornuta	102	3.5	12.25	30	2.44898	m
csmr123	medium	O_cornuta	102	4.3	18.49	61.1	3.30449	f
csmr124	medium	O_cornuta	102	3.8	14.44	38.7	2.68006	f
csmr125	medium	O_cornuta	102	4.6	21.16	77.6	3.6673	f
csmr126	medium	O_cornuta	102	4.2	17.64	49.5	2.80612	f
csmr127	medium	O_cornuta	102	4.6	21.16	72.4	3.42155	f
csmr128	medium	O_cornuta	102	3.5	12.25	34.3	2.8	m
csme007	medium	O_cornuta	103	4.4	19.36	59.6	3.07851	f
csme072	medium	O_cornuta	103	3.9	15.21	37.9	2.49178	f
csme097	medium	O_cornuta	103	4.2	17.64	52.6	2.98186	f
csme054	medium	O_cornuta	103	4.5	20.25	66.1	3.2642	f
csme021	medium	O_cornuta	103	4.5	20.25	65.4	3.22963	f
csme015	medium	O_cornuta	104	4.1	16.81	46.6	2.77216	f
csme022	medium	O_cornuta	104	4.5	20.25	66.2	3.26914	f
csmr129	medium	O_cornuta	104	4.1	16.81	48.4	2.87924	f
csmr130	medium	O_cornuta	104	4.4	19.36	62.5	3.22831	f
csmr131	medium	O_cornuta	104	4.5	20.25	65.4	3.22963	f
csme032	medium	O_cornuta	105	4.1	16.81	54	3.21237	f
csme017	medium	O_cornuta	105	4.4	19.36	62.6	3.23347	f
csmr132	medium	O_cornuta	105	4.5	20.25	66.8	3.29877	f
csmr133	medium	O_cornuta	105	4.3	18.49	59.5	3.21796	f
csmr134	medium	O_cornuta	105	4.4	19.36	64.8	3.34711	f
csmr135	medium	O_cornuta	105	4.1	16.81	55.6	3.30756	f
csmr136	medium	O_cornuta	105	4.2	17.64	56.2	3.18594	f
csmr137	medium	O_cornuta	105	3.8	14.44	47.1	3.26177	f
csme059	medium	O_cornuta	106	4.4	19.36	56.9	2.93905	f
csmr138	medium	O_cornuta	106	4.7	22.09	78.8	3.56722	f
csmr139	medium	O_cornuta	106	4.3	18.49	51.4	2.77988	f
csmr140	medium	O_cornuta	106	4.6	21.16	70.8	3.34594	f
csmr141	medium	O_cornuta	106	4.3	18.49	62.6	3.38561	f
csmr142	medium	O_cornuta	107	4.7	22.09	75.1	3.39973	f
csmr143	medium	O_cornuta	107	3.7	13.69	40	2.92184	f
csmr144	medium	O_cornuta	107	3.8	14.44	47.7	3.30332	f
csme016	medium	O_cornuta	107	4.3	18.49	53.6	2.89886	f
csmr145	medium	O_cornuta	108	4.5	20.25	70.8	3.4963	f
csmr146	medium	O_cornuta	108	4.7	22.09	76.4	3.45858	f
csmr147	medium	O_cornuta	108	3.9	15.21	44.2	2.90598	f
csmr148	medium	O_cornuta	108	4.2	17.64	73.8	4.18367	f
csmr149	medium	O_cornuta	108	4.5	20.25	69.6	3.43704	f
csmr150	medium	O_cornuta	108	4.5	20.25	64	3.16049	f
csme033	medium	O_cornuta	109	4.3	18.49	54.2	2.93131	f
csmr151	medium	O_cornuta	109	4.4	19.36	59.7	3.08368	f
csmr152	medium	O_cornuta	110	4	16	50.6	3.1625	f
csmr153	medium	O_cornuta	110	4.5	20.25	67.1	3.31358	f
csmr154	medium	O_cornuta	110	4.4	19.36	59.4	3.06818	f
csmr155	medium	O_cornuta	110	4.3	18.49	55.7	3.01244	f
csmr156	medium	O_cornuta	110	4.6	21.16	66.8	3.1569	f
csmr157	medium	O_cornuta	110	4.4	19.36	63.3	3.26963	f
csme065	medium	O_cornuta	111	4.2	17.64	52.9	2.99887	f
csmr158	medium	O_cornuta	111	4.7	22.09	77.1	3.49027	f
csmr159	medium	O_cornuta	111	4.6	21.16	69.8	3.29868	f
csmr160	medium	O_cornuta	111	4.4	19.36	58.8	3.03719	f
csmr161	medium	O_cornuta	111	4.5	20.25	66	3.25926	f
csmr162	medium	O_cornuta	111	4.1	16.81	56.3	3.3492	f
csme073	medium	O_cornuta	112	3.9	15.21	46.6	3.06377	f
csmr163	medium	O_cornuta	112	3.3	10.89	27.4	2.51607	f
csmr164	medium	O_cornuta	112	4.1	16.81	50	2.97442	f
csmr165	medium	O_cornuta	112	3.5	12.25	29.4	2.4	m
csme079	medium	O_cornuta	113	3.5	12.25	51.6	4.21224	f
csmr166	medium	O_cornuta	113	4	16	41.3	2.58125	f
csme031	medium	O_cornuta	114	3.5	12.25	30.2	2.46531	f
csmr167	medium	O_cornuta	114	4.3	18.49	57.9	3.13142	f
csmr168	medium	O_cornuta	114	4.4	19.36	60.8	3.1405	f
csme003	medium	O_cornuta	115	4.1	16.81	50.7	3.01606	f
csme023	medium	O_cornuta	115	4.2	17.64	56.7	3.21429	f
csme100	medium	O_cornuta	118	3.9	15.21	42.9	2.82051	f
csme047	medium	O_cornuta	120	4.3	18.49	58.8	3.1801	f
csmr169	medium	O_cornuta	120	4.3	18.49	49.5	2.67712	f
csmr170	medium	O_cornuta	120	4.9	24.01	69.7	2.90296	f
csmr171	medium	O_cornuta	121	4.4	19.36	54	2.78926	f
rsmr001	medium	O_rufa	107	3.2	10.24	19.2	1.875	m
rsmr002	medium	O_rufa	107	3.1	9.61	25.3	2.63267	m
rsmr003	medium	O_rufa	107	3.4	11.56	32.3	2.79412	m
rsme047	medium	O_rufa	109	3.2	10.24	25.2	2.46094	m
rsmr004	medium	O_rufa	110	3.3	10.89	26.2	2.40588	m
rsmr005	medium	O_rufa	111	3.4	11.56	28.9	2.5	m
rsme038	medium	O_rufa	112	3.1	9.61	22	2.28928	m
rsme017	medium	O_rufa	112	3.4	11.56	33	2.85467	m
rsme050	medium	O_rufa	112	3.5	12.25	31.4	2.56327	m
rsme087	medium	O_rufa	112	3.3	10.89	25.6	2.35078	m
rsme064	medium	O_rufa	112	3.2	10.24	26.6	2.59766	m
rsmr006	medium	O_rufa	112	3.1	9.61	19.9	2.07076	m
rsmr007	medium	O_rufa	112	3.2	10.24	24.9	2.43164	m
rsmr008	medium	O_rufa	112	3.1	9.61	22.5	2.34131	m
rsme019	medium	O_rufa	113	3.4	11.56	31.5	2.72491	m
rsme085	medium	O_rufa	113	3.4	11.56	28.2	2.43945	m
rsme073	medium	O_rufa	113	3.2	10.24	22.6	2.20703	m
rsmr009	medium	O_rufa	113	3.1	9.61	21.8	2.26847	m
rsmr010	medium	O_rufa	113	3.3	10.89	28.1	2.58035	m
rsmr011	medium	O_rufa	113	3.3	10.89	29.8	2.73646	m
rsmr012	medium	O_rufa	113	3	9	19.3	2.14444	m
rsmr013	medium	O_rufa	113	3.1	9.61	21.2	2.20604	f
rsmr014	medium	O_rufa	113	3.7	13.69	37.9	2.76844	m
rsme063	medium	O_rufa	114	3.2	10.24	24.3	2.37305	m
rsme052	medium	O_rufa	114	3	9	18.2	2.02222	m
rsmr015	medium	O_rufa	114	3.5	12.25	34.4	2.80816	m
rsmr016	medium	O_rufa	114	3.2	10.24	24.7	2.41211	m
rsmr017	medium	O_rufa	114	3.3	10.89	25.8	2.36915	m
rsmr018	medium	O_rufa	114	3	9	20.4	2.26667	m
rsmr019	medium	O_rufa	114	3.4	11.56	29	2.50865	m
rsmr020	medium	O_rufa	114	3.2	10.24	26.5	2.58789	m
rsmr021	medium	O_rufa	114	3.4	11.56	33.8	2.92388	m
rsme004	medium	O_rufa	115	3.4	11.56	30.2	2.61246	m
rsme098	medium	O_rufa	115	3.7	13.69	37.7	2.75383	m
rsme093	medium	O_rufa	115	3.3	10.89	29.4	2.69972	m
rsmr022	medium	O_rufa	115	3	9	18.6	2.06667	m
rsmr023	medium	O_rufa	115	3.5	12.25	31.6	2.57959	m
rsmr024	medium	O_rufa	115	3.1	9.61	25.6	2.66389	m
rsmr025	medium	O_rufa	115	3.3	10.89	27.7	2.54362	m
rsme060	medium	O_rufa	116	3.3	10.89	29.9	2.74564	m
rsme094	medium	O_rufa	116	3.2	10.24	26.6	2.59766	m
rsme091	medium	O_rufa	116	3.4	11.56	33.2	2.87197	m
rsme001	medium	O_rufa	116	3.4	11.56	33.5	2.89792	m
rsme036	medium	O_rufa	117	3.2	10.24	24.6	2.40234	m
rsme058	medium	O_rufa	117	3.3	10.89	26.9	2.47016	m
rsme065	medium	O_rufa	117	3.4	11.56	29	2.50865	m
rsme018	medium	O_rufa	117	3.2	10.24	28	2.73437	m
rsme040	medium	O_rufa	117	3.5	12.25	35	2.85714	m
rsmr026	medium	O_rufa	117	3.2	10.24	24.1	2.35352	m
rsmr027	medium	O_rufa	117	3.2	10.24	26.7	2.60742	m
rsme030	medium	O_rufa	118	3.3	10.89	28.3	2.59871	m
rsme039	medium	O_rufa	118	3	9	22.4	2.48889	m
rsme095	medium	O_rufa	118	3.3	10.89	27.8	2.5528	m
rsme092	medium	O_rufa	118	3.1	9.61	22.8	2.37253	m
rsme100	medium	O_rufa	118	3.5	12.25	30.8	2.51429	m
rsme070	medium	O_rufa	118	3.3	10.89	29.4	2.69972	m
rsmr028	medium	O_rufa	118	3.5	12.25	29.8	2.43265	m
rsmr029	medium	O_rufa	118	3.2	10.24	24.8	2.42187	m
rsmr030	medium	O_rufa	118	3.1	9.61	20.5	2.13319	m
rsmr031	medium	O_rufa	118	3.1	9.61	20.6	2.1436	m
rsmr032	medium	O_rufa	118	3.3	10.89	31.6	2.90174	m
rsmr033	medium	O_rufa	118	3.5	12.25	32.9	2.68571	m
rsmr034	medium	O_rufa	118	3.3	10.89	24.4	2.24059	m
rsme014	medium	O_rufa	119	3.6	12.96	35.6	2.74691	m
rsme029	medium	O_rufa	119	3.3	10.89	28.4	2.6079	m
rsmr035	medium	O_rufa	119	3.5	12.25	34.8	2.84082	m
rsmr036	medium	O_rufa	119	3.4	11.56	30.1	2.60381	m
rsme020	medium	O_rufa	120	3.5	12.25	30.4	2.48163	m
rsme021	medium	O_rufa	120	3.3	10.89	23	2.11203	m
rsme015	medium	O_rufa	120	3.2	10.24	21.6	2.10937	m
rsme049	medium	O_rufa	120	3.4	11.56	32.7	2.82872	m
rsme044	medium	O_rufa	120	3.4	11.56	31.2	2.69896	m
rsme045	medium	O_rufa	120	3.1	9.61	19.3	2.00832	m
rsme048	medium	O_rufa	120	3.2	10.24	24.9	2.43164	m
rsme011	medium	O_rufa	120	3.2	10.24	27.3	2.66602	m
rsme077	medium	O_rufa	120	3.3	10.89	28.3	2.59871	m
rsme075	medium	O_rufa	120	3.3	10.89	25.7	2.35996	m
rsme076	medium	O_rufa	120	3.2	10.24	21.8	2.12891	m
rsme066	medium	O_rufa	120	3.3	10.89	27.1	2.48852	m
rsme096	medium	O_rufa	120	3	9	22.7	2.52222	m
rsme054	medium	O_rufa	120	3.1	9.61	20.8	2.16441	m
rsme071	medium	O_rufa	120	3.3	10.89	25.9	2.37833	m
rsme090	medium	O_rufa	120	3.2	10.24	22.4	2.1875	m
rsme056	medium	O_rufa	120	3.4	11.56	28.2	2.43945	m
rsme062	medium	O_rufa	120	3.5	12.25	29.7	2.42449	m
rsme057	medium	O_rufa	120	2.7	7.29	14.1	1.93416	m
rsmr037	medium	O_rufa	120	3.6	12.96	32.9	2.53858	m
rsmr038	medium	O_rufa	120	3.1	9.61	23.4	2.43496	m
rsmr039	medium	O_rufa	120	3.4	11.56	23.4	2.02422	m
rsmr040	medium	O_rufa	120	3.1	9.61	20.6	2.1436	m
rsmr041	medium	O_rufa	120	3.4	11.56	30.4	2.62976	m
rsmr042	medium	O_rufa	120	3	9	16.7	1.85556	m
rsmr043	medium	O_rufa	120	4.2	17.64	53.7	3.04422	f
rsmr044	medium	O_rufa	120	4.1	16.81	52.4	3.11719	f
rsmr045	medium	O_rufa	120	3.2	10.24	23.2	2.26562	m
rsmr046	medium	O_rufa	120	4.1	16.81	52.4	3.11719	f
rsmr047	medium	O_rufa	120	2.9	8.41	14.4	1.71225	m
rsmr048	medium	O_rufa	121	3.8	14.44	44.9	3.10942	f
rsmr049	medium	O_rufa	121	4	16	50.2	3.1375	f
rsmr050	medium	O_rufa	121	3.8	14.44	42.9	2.97091	f
rsmr051	medium	O_rufa	121	4	16	53.6	3.35	f
rsmr052	medium	O_rufa	121	3.8	14.44	47.8	3.31025	f
rsmr053	medium	O_rufa	121	3.7	13.69	38.4	2.80497	f
rsmr054	medium	O_rufa	121	4.2	17.64	60.8	3.44671	f
rsmr055	medium	O_rufa	121	4.4	19.36	63.3	3.26963	f
rsmr056	medium	O_rufa	121	3.8	14.44	47.2	3.2687	f
rsme078	medium	O_rufa	121	3.3	10.89	27.8	2.5528	m
rsme024	medium	O_rufa	122	4.1	16.81	50.1	2.98037	f
rsmr057	medium	O_rufa	122	4.3	18.49	66.1	3.57491	f
rsmr058	medium	O_rufa	122	3.7	13.69	35.3	2.57852	f
rsmr059	medium	O_rufa	122	4	16	45.2	2.825	f
rsmr060	medium	O_rufa	122	4	16	45.8	2.8625	f
rsmr061	medium	O_rufa	122	4	16	53.1	3.31875	f
rsmr062	medium	O_rufa	122	4.2	17.64	55.3	3.13492	f
rsmr063	medium	O_rufa	122	4.2	17.64	54	3.06122	f
rsmr064	medium	O_rufa	122	4.3	18.49	67.9	3.67226	f
rsmr065	medium	O_rufa	122	4.3	18.49	59.2	3.20173	f
rsmr066	medium	O_rufa	122	3.6	12.96	34.2	2.63889	f
rsmr067	medium	O_rufa	122	3.8	14.44	49.2	3.4072	f
rsmr068	medium	O_rufa	122	3.8	14.44	38	2.63158	f
rsmr069	medium	O_rufa	123	4	16	50	3.125	f
rsmr070	medium	O_rufa	123	4.2	17.64	59.4	3.36735	f
rsmr071	medium	O_rufa	123	4.3	18.49	59.4	3.21255	f
rsmr072	medium	O_rufa	123	4.3	18.49	59.8	3.23418	f
rsmr073	medium	O_rufa	123	3.9	15.21	48.9	3.21499	f
rsmr074	medium	O_rufa	123	3.8	14.44	43.2	2.99169	f
rsme084	medium	O_rufa	124	3.8	14.44	43.1	2.98476	f
rsmr075	medium	O_rufa	124	4	16	50.2	3.1375	f
rsmr076	medium	O_rufa	124	4	16	45.4	2.8375	f
rsmr077	medium	O_rufa	124	3.8	14.44	39.5	2.73546	f
rsmr078	medium	O_rufa	124	3.5	12.25	34	2.77551	f
rsmr079	medium	O_rufa	124	3.8	14.44	40	2.77008	f
rsmr080	medium	O_rufa	124	4	16	48.8	3.05	f
rsmr081	medium	O_rufa	124	4.3	18.49	60.3	3.26122	f
rsmr082	medium	O_rufa	124	4	16	44.2	2.7625	f
rsmr083	medium	O_rufa	124	3.7	13.69	35	2.55661	f
rsmr084	medium	O_rufa	124	4.3	18.49	58.8	3.1801	f
rsmr085	medium	O_rufa	124	4.2	17.64	55.3	3.13492	f
rsmr086	medium	O_rufa	125	4.2	17.64	59	3.34467	f
rsmr087	medium	O_rufa	125	4.3	18.49	63.1	3.41266	f
rsmr088	medium	O_rufa	125	4.2	17.64	54.6	3.09524	f
rsmr089	medium	O_rufa	125	4.1	16.81	55.9	3.3254	f
rsmr090	medium	O_rufa	125	4.1	16.81	57.4	3.41463	f
rsmr091	medium	O_rufa	126	4	16	54.4	3.4	f
rsmr092	medium	O_rufa	126	4	16	51.2	3.2	f
rsmr093	medium	O_rufa	126	4.1	16.81	46.8	2.78406	f
rsmr094	medium	O_rufa	126	4.2	17.64	55.6	3.15193	f
rsmr095	medium	O_rufa	126	3.7	13.69	35.4	2.58583	f
rsmr096	medium	O_rufa	127	4.2	17.64	58.3	3.30499	f
rsmr097	medium	O_rufa	127	3.8	14.44	34.7	2.40305	f
rsme067	medium	O_rufa	128	3.3	10.89	25.4	2.33242	f
rsmr098	medium	O_rufa	128	3.7	13.69	39.5	2.88532	f
rsmr099	medium	O_rufa	128	3.7	13.69	38.1	2.78305	f
rsmr100	medium	O_rufa	128	4.3	18.49	56.4	3.0503	f
rsmr101	medium	O_rufa	128	4	16	45.9	2.86875	f
rsmr102	medium	O_rufa	128	3.7	13.69	37.6	2.74653	f
rsmr103	medium	O_rufa	128	3.7	13.69	38	2.77575	f
rsmr104	medium	O_rufa	128	3.7	13.69	37.9	2.76844	f
rsmr105	medium	O_rufa	128	4.1	16.81	53.8	3.20048	f
rsmr106	medium	O_rufa	128	4	16	47.1	2.94375	f
rsmr107	medium	O_rufa	129	3.9	15.21	49.4	3.24786	f
rsmr108	medium	O_rufa	129	4.2	17.64	55.2	3.12925	f
rsmr109	medium	O_rufa	129	4.2	17.64	49.7	2.81746	f
rsmr110	medium	O_rufa	129	3.8	14.44	44.3	3.06787	f
rsmr111	medium	O_rufa	129	3.9	15.21	47.1	3.09665	f
rsmr112	medium	O_rufa	129	4.2	17.64	50.2	2.8458	f
rsmr113	medium	O_rufa	129	4	16	52.8	3.3	f
rsmr114	medium	O_rufa	129	3.7	13.69	37.2	2.71731	f
rsmr115	medium	O_rufa	129	4.1	16.81	44.3	2.63534	f
rsmr116	medium	O_rufa	130	3.8	14.44	40.3	2.79086	f
rsmr117	medium	O_rufa	130	4.1	16.81	51.6	3.0696	f
rsmr118	medium	O_rufa	130	4.2	17.64	54.9	3.11224	f
rsmr119	medium	O_rufa	130	4.2	17.64	53.9	3.05556	f
rsmr120	medium	O_rufa	130	3.6	12.96	29.8	2.29938	f
rsmr121	medium	O_rufa	130	3.9	15.21	49.5	3.25444	f
rsmr122	medium	O_rufa	130	4.3	18.49	54.5	2.94754	f
rsmr123	medium	O_rufa	130	4.3	18.49	61.3	3.31531	f
rsmr124	medium	O_rufa	130	4.1	16.81	49.6	2.95062	f
rsmr125	medium	O_rufa	130	4.1	16.81	46.7	2.77811	f
rsmr126	medium	O_rufa	130	4	16	38.1	2.38125	f
rsmr127	medium	O_rufa	130	3.6	12.96	31.7	2.44599	f
rsme032	medium	O_rufa	130	4	16	45.4	2.8375	f
rsme009	medium	O_rufa	130	3.8	14.44	43.7	3.02632	f
rsme005	medium	O_rufa	131	3.7	13.69	34.3	2.50548	f
rsme033	medium	O_rufa	131	3.7	13.69	37.9	2.76844	f
rsmr128	medium	O_rufa	131	4.1	16.81	50	2.97442	f
rsmr130	medium	O_rufa	131	4	16	44.1	2.75625	f
rsmr131	medium	O_rufa	131	3.8	14.44	41.7	2.88781	f
rsmr132	medium	O_rufa	131	3.6	12.96	35.8	2.76235	f
rsmr133	medium	O_rufa	131	4.3	18.49	53.9	2.91509	f
rsmr134	medium	O_rufa	131	4	16	37.7	2.35625	f
rsmr135	medium	O_rufa	131	4.1	16.81	45.7	2.71862	f
rsmr136	medium	O_rufa	131	3.9	15.21	43.3	2.84681	f
rsmr137	medium	O_rufa	131	4.3	18.49	57.5	3.10979	f
rsmr138	medium	O_rufa	131	4.1	16.81	47.4	2.81975	f
rsmr139	medium	O_rufa	131	3.7	13.69	31.4	2.29364	f
rsmr140	medium	O_rufa	131	4.2	17.64	51.3	2.90816	f
rsmr141	medium	O_rufa	131	4.2	17.64	48.2	2.73243	f
rsmr142	medium	O_rufa	131	4.2	17.64	54	3.06122	f
rsmr143	medium	O_rufa	131	4.3	18.49	57.9	3.13142	f
rsme079	medium	O_rufa	132	3.5	12.25	30.5	2.4898	f
rsme010	medium	O_rufa	132	4.1	16.81	50.9	3.02796	f
rsmr144	medium	O_rufa	132	3.9	15.21	41.1	2.70217	f
rsmr145	medium	O_rufa	132	3.8	14.44	34.3	2.37535	f
rsmr146	medium	O_rufa	132	3.8	14.44	42.7	2.95706	f
rsmr147	medium	O_rufa	132	4.1	16.81	51.7	3.07555	f
rsmr148	medium	O_rufa	132	4	16	45.8	2.8625	f
rsmr149	medium	O_rufa	132	4.2	17.64	51.3	2.90816	f
rsmr150	medium	O_rufa	132	3.7	13.69	36.6	2.67348	f
rsmr151	medium	O_rufa	132	4	16	51	3.1875	f
rsmr152	medium	O_rufa	132	4.2	17.64	54.2	3.07256	f
rsmr153	medium	O_rufa	132	4	16	46.7	2.91875	f
rsmr154	medium	O_rufa	132	4.1	16.81	50.7	3.01606	f
rsmr155	medium	O_rufa	132	3.9	15.21	40.3	2.64957	f
rsme089	medium	O_rufa	133	3.8	14.44	36.9	2.5554	f
rsme008	medium	O_rufa	133	3.3	10.89	32.5	2.98439	f
rsme072	medium	O_rufa	133	3.9	15.21	40.3	2.64957	f
rsme031	medium	O_rufa	133	4	16	50.7	3.16875	f
rsmr156	medium	O_rufa	133	4.1	16.81	51.3	3.05175	f
rsmr157	medium	O_rufa	133	4.1	16.81	47.5	2.8257	f
rsmr158	medium	O_rufa	133	4.4	19.36	59.6	3.07851	f
rsmr159	medium	O_rufa	133	4.2	17.64	53.8	3.04989	f
rsmr160	medium	O_rufa	133	3.8	14.44	42.5	2.94321	f
rsmr161	medium	O_rufa	133	3.6	12.96	28.5	2.19907	f
rsmr162	medium	O_rufa	133	3.9	15.21	43.6	2.86654	f
rsmr163	medium	O_rufa	133	4	16	43.1	2.69375	f
rsmr164	medium	O_rufa	133	3.9	15.21	44	2.89283	f
rsme042	medium	O_rufa	134	4	16	40.3	2.51875	f
rsme035	medium	O_rufa	134	3.3	10.89	25.1	2.30487	f
rsmr165	medium	O_rufa	134	4	16	40.4	2.525	f
rsmr166	medium	O_rufa	134	3.6	12.96	36.6	2.82407	f
rsmr167	medium	O_rufa	134	3.9	15.21	42.4	2.78764	f
rsmr168	medium	O_rufa	134	3.5	12.25	37.1	3.02857	f
rsmr169	medium	O_rufa	134	3.8	14.44	41.7	2.88781	f
rsmr170	medium	O_rufa	134	4.1	16.81	50.8	3.02201	f
rsmr171	medium	O_rufa	134	3.4	11.56	23.4	2.02422	f
rsmr172	medium	O_rufa	134	4.2	17.64	48.5	2.74943	f
rsme086	medium	O_rufa	135	3.9	15.21	38.5	2.53123	f
rsmr173	medium	O_rufa	135	3	9	22.4	2.48889	f
rsmr174	medium	O_rufa	135	4.4	19.36	61.4	3.17149	f
rsmr175	medium	O_rufa	135	4.2	17.64	50.9	2.88549	f
rsmr176	medium	O_rufa	135	3.9	15.21	41.2	2.70874	f
rsme025	medium	O_rufa	136	4	16	50.5	3.15625	f
rsme027	medium	O_rufa	136	4.1	16.81	50.2	2.98632	f
rsme003	medium	O_rufa	136	3.8	14.44	37.8	2.61773	f
rsme046	medium	O_rufa	136	3.9	15.21	45.1	2.96515	f
rsmr177	medium	O_rufa	136	4.1	16.81	52.3	3.11124	f
rsmr178	medium	O_rufa	136	3.8	14.44	39.5	2.73546	f
rsmr179	medium	O_rufa	136	4	16	49.3	3.08125	f
rsme088	medium	O_rufa	137	3.9	15.21	41.2	2.70874	f
rsme082	medium	O_rufa	137	3.5	12.25	35.4	2.8898	f
rsme074	medium	O_rufa	138	3.6	12.96	33.2	2.56173	f
rsme097	medium	O_rufa	138	3.3	10.89	25.7	2.35996	f
rsme034	medium	O_rufa	138	3.9	15.21	46.4	3.05062	f
rsmr180	medium	O_rufa	138	3.9	15.21	45.8	3.01118	f
rsmr181	medium	O_rufa	138	3.4	11.56	25.5	2.20588	f
rsmr182	medium	O_rufa	138	4	16	50.7	3.16875	f
rsmr183	medium	O_rufa	138	4.1	16.81	50.9	3.02796	f
rsme043	medium	O_rufa	139	3.6	12.96	36.7	2.83179	f
rsme068	medium	O_rufa	139	3.6	12.96	37.6	2.90123	f
rsme023	medium	O_rufa	139	3.7	13.69	36.1	2.63696	f
rsme099	medium	O_rufa	139	3.6	12.96	39.8	3.07099	f
rsme051	medium	O_rufa	139	3.8	14.44	42	2.90859	f
rsmr184	medium	O_rufa	139	4.3	18.49	52	2.81233	f
rsmr185	medium	O_rufa	139	3	9	21.9	2.43333	f
rsmr186	medium	O_rufa	139	3.8	14.44	43	2.97784	f
rsmr187	medium	O_rufa	139	4.2	17.64	55.7	3.1576	f
rsmr188	medium	O_rufa	139	3.8	14.44	39.4	2.72853	f
rsmr189	medium	O_rufa	139	4	16	42.2	2.6375	f
rsme006	medium	O_rufa	140	3.9	15.21	41.7	2.74162	f
rsme002	medium	O_rufa	140	3.1	9.61	23.2	2.41415	f
rsme081	medium	O_rufa	140	3.8	14.44	37	2.56233	f
rsme037	medium	O_rufa	140	3.2	10.24	25.2	2.46094	f
rsme041	medium	O_rufa	140	3.2	10.24	28.3	2.76367	f
rsme053	medium	O_rufa	140	3.9	15.21	43.6	2.86654	f
rsmr190	medium	O_rufa	140	4.2	17.64	52.5	2.97619	f
rsmr191	medium	O_rufa	140	4.4	19.36	54.9	2.83574	f
rsme012	medium	O_rufa	141	3.3	10.89	26.8	2.46097	f
rsme059	medium	O_rufa	141	3.7	13.69	40.2	2.93645	f
rsme083	medium	O_rufa	141	4	16	49.4	3.0875	f
rsme069	medium	O_rufa	142	3.8	14.44	38.6	2.67313	f
rsme026	medium	O_rufa	142	3.8	14.44	33.9	2.34765	f
rsmr192	medium	O_rufa	142	3.7	13.69	30.1	2.19869	f
rsme080	medium	O_rufa	146	3.1	9.61	20.9	2.17482	f
rsmr193	medium	O_rufa	146	4	16	45.6	2.85	f
rsmr194	medium	O_rufa	149	4.2	17.64	45.3	2.56803	f
cskr001	cold	O_cornuta	105	3.5	12.25	30.9	2.52245	m
cskr002	cold	O_cornuta	106	3.7	13.69	38.6	2.81958	m
cskr003	cold	O_cornuta	106	3.6	12.96	35.3	2.72377	m
cskr004	cold	O_cornuta	108	3.7	13.69	39.8	2.90723	m
cskr005	cold	O_cornuta	108	3.7	13.69	36.3	2.65157	m
cskr006	cold	O_cornuta	110	3.8	14.44	42.2	2.92244	m
cskr007	cold	O_cornuta	110	3.6	12.96	35.7	2.75463	m
cskr008	cold	O_cornuta	112	3.7	13.69	36.6	2.67348	m
cskr009	cold	O_cornuta	112	3.4	11.56	29	2.50865	m
cske076	cold	O_cornuta	113	3.8	14.44	39.6	2.74238	m
cskr010	cold	O_cornuta	115	4	16	48.4	3.025	m
cskr011	cold	O_cornuta	116	3.6	12.96	34.6	2.66975	m
cskr012	cold	O_cornuta	117	3.2	10.24	20.3	1.98242	m
cskr013	cold	O_cornuta	117	3.9	15.21	40.9	2.68902	m
cskr014	cold	O_cornuta	118	4	16	47.3	2.95625	m
cskr015	cold	O_cornuta	118	3.8	14.44	41	2.83934	m
cskr016	cold	O_cornuta	118	4.1	16.81	45.9	2.73052	m
cskr017	cold	O_cornuta	119	3.7	13.69	37.5	2.73923	m
cskr018	cold	O_cornuta	119	3.3	10.89	30.7	2.8191	m
cskr019	cold	O_cornuta	119	3.6	12.96	33.1	2.55401	m
cskr020	cold	O_cornuta	119	3.7	13.69	37.2	2.71731	m
cske018	cold	O_cornuta	120	4.1	16.81	56.1	3.3373	f
cske019	cold	O_cornuta	120	4	16	43.4	2.7125	m
cske016	cold	O_cornuta	120	3.7	13.69	36.8	2.68809	m
cske026	cold	O_cornuta	120	3.3	10.89	27.5	2.52525	m
cske030	cold	O_cornuta	120	3.8	14.44	46.2	3.19945	m
cske032	cold	O_cornuta	120	3.7	13.69	33.1	2.41782	m
cske043	cold	O_cornuta	120	3.5	12.25	30.5	2.4898	m
cske046	cold	O_cornuta	120	3.8	14.44	40.3	2.79086	m
cske047	cold	O_cornuta	120	3.5	12.25	28.3	2.3102	m
cske039	cold	O_cornuta	120	3.9	15.21	39.1	2.57068	m
cske042	cold	O_cornuta	120	3.7	13.69	38.6	2.81958	m
cske040	cold	O_cornuta	120	4.4	19.36	61.7	3.18698	f
cske023	cold	O_cornuta	120	3.8	14.44	39.9	2.76316	m
cske022	cold	O_cornuta	120	3.7	13.69	33.6	2.45435	m
cske010	cold	O_cornuta	120	3.7	13.69	38.5	2.81227	m
cske012	cold	O_cornuta	120	3.9	15.21	39.4	2.5904	m
cske007	cold	O_cornuta	120	3.6	12.96	31.4	2.42284	m
cske008	cold	O_cornuta	120	3.6	12.96	30.8	2.37654	m
cske003	cold	O_cornuta	120	3.8	14.44	41.4	2.86704	m
cske004	cold	O_cornuta	120	3.6	12.96	36.6	2.82407	m
cske006	cold	O_cornuta	120	3.6	12.96	35.1	2.70833	m
cske015	cold	O_cornuta	120	3.9	15.21	41.2	2.70874	m
cske013	cold	O_cornuta	120	3.7	13.69	36.6	2.67348	m
cske001	cold	O_cornuta	120	3.8	14.44	37	2.56233	m
cske071	cold	O_cornuta	120	3.7	13.69	37.8	2.76114	m
cske073	cold	O_cornuta	120	4.1	16.81	47.1	2.8019	m
cske055	cold	O_cornuta	120	4.1	16.81	50.1	2.98037	m
cske065	cold	O_cornuta	120	4.1	16.81	52.5	3.12314	m
cske066	cold	O_cornuta	120	3.7	13.69	40.7	2.97297	m
cske089	cold	O_cornuta	120	3.7	13.69	35.5	2.59313	m
cske080	cold	O_cornuta	120	3.6	12.96	39.1	3.01698	m
cske100	cold	O_cornuta	120	3.5	12.25	31	2.53061	m
cske096	cold	O_cornuta	120	3.7	13.69	35.6	2.60044	m
cske092	cold	O_cornuta	120	4.4	19.36	67.2	3.47107	f
cske099	cold	O_cornuta	120	3.4	11.56	28.2	2.43945	m
cskr021	cold	O_cornuta	120	4.4	19.36	62.5	3.22831	f
cskr022	cold	O_cornuta	120	3.2	10.24	29.9	2.91992	m
cskr023	cold	O_cornuta	120	3.5	12.25	28.8	2.35102	m
cskr024	cold	O_cornuta	120	3.6	12.96	35	2.70062	m
cskr025	cold	O_cornuta	120	3.6	12.96	31.3	2.41512	m
cskr026	cold	O_cornuta	120	3.6	12.96	33.3	2.56944	m
cskr027	cold	O_cornuta	120	3.4	11.56	32.9	2.84602	m
cskr028	cold	O_cornuta	120	3.7	13.69	37.1	2.71001	m
cskr029	cold	O_cornuta	120	3.5	12.25	33.1	2.70204	m
cskr030	cold	O_cornuta	120	3.5	12.25	29.6	2.41633	m
cskr031	cold	O_cornuta	120	3.7	13.69	38.5	2.81227	m
cskr032	cold	O_cornuta	120	3.7	13.69	38.2	2.79036	m
cskr033	cold	O_cornuta	120	4.4	19.36	63.7	3.29029	f
cskr034	cold	O_cornuta	120	3.6	12.96	34.4	2.65432	m
cskr035	cold	O_cornuta	120	4.2	17.64	61.1	3.46372	f
cskr036	cold	O_cornuta	120	4.3	18.49	63.8	3.45051	f
cskr037	cold	O_cornuta	120	3.8	14.44	41.5	2.87396	m
cskr038	cold	O_cornuta	120	3.6	12.96	37.6	2.90123	m
cskr039	cold	O_cornuta	120	3.5	12.25	33.3	2.71837	m
cskr040	cold	O_cornuta	120	3.2	10.24	29.4	2.87109	m
cskr041	cold	O_cornuta	120	3.5	12.25	34.1	2.78367	m
cskr042	cold	O_cornuta	120	4.2	17.64	55.5	3.14626	f
cskr043	cold	O_cornuta	120	3.8	14.44	36	2.49307	m
cskr044	cold	O_cornuta	120	4	16	42.4	2.65	m
cskr045	cold	O_cornuta	120	4.3	18.49	62.5	3.38021	f
cskr046	cold	O_cornuta	120	3.8	14.44	47.5	3.28947	f
cskr047	cold	O_cornuta	120	3.5	12.25	33.4	2.72653	m
cskr048	cold	O_cornuta	120	4.6	21.16	72.1	3.40737	f
cskr049	cold	O_cornuta	120	3.5	12.25	29.1	2.37551	m
cskr050	cold	O_cornuta	120	3.5	12.25	31.2	2.54694	m
cskr051	cold	O_cornuta	120	4.2	17.64	52.7	2.98753	f
cskr052	cold	O_cornuta	120	3.3	10.89	25.5	2.3416	m
cskr053	cold	O_cornuta	120	3.7	13.69	36	2.62966	m
cskr054	cold	O_cornuta	120	3.4	11.56	28.4	2.45675	m
cskr055	cold	O_cornuta	120	4.4	19.36	66.1	3.41426	f
cskr056	cold	O_cornuta	120	4.5	20.25	64.6	3.19012	f
cskr057	cold	O_cornuta	120	4.5	20.25	66.3	3.27407	f
cskr058	cold	O_cornuta	120	4.1	16.81	59.7	3.55146	f
cskr059	cold	O_cornuta	120	4.4	19.36	67.4	3.4814	f
cskr060	cold	O_cornuta	120	3.5	12.25	24.8	2.02449	m
cskr061	cold	O_cornuta	120	3.6	12.96	35.5	2.7392	m
cskr062	cold	O_cornuta	120	3.8	14.44	42.5	2.94321	m
cskr063	cold	O_cornuta	120	4.3	18.49	62.1	3.35857	f
cskr064	cold	O_cornuta	120	3.7	13.69	34.7	2.5347	m
cskr065	cold	O_cornuta	120	3	9	28	3.11111	m
cskr066	cold	O_cornuta	120	3.5	12.25	32.5	2.65306	m
cskr067	cold	O_cornuta	120	4.1	16.81	59.2	3.52171	f
cskr068	cold	O_cornuta	120	2.9	8.41	18.2	2.16409	m
cskr069	cold	O_cornuta	120	4.2	17.64	58.6	3.322	f
cskr070	cold	O_cornuta	120	3.6	12.96	31.3	2.41512	m
cskr071	cold	O_cornuta	120	3.8	14.44	40.2	2.78393	m
cskr072	cold	O_cornuta	120	4.3	18.49	62.5	3.38021	f
cskr073	cold	O_cornuta	120	3.7	13.69	34.4	2.51278	m
cskr074	cold	O_cornuta	120	3.5	12.25	31.3	2.5551	m
cskr075	cold	O_cornuta	120	3.7	13.69	38.3	2.79766	f
cskr076	cold	O_cornuta	120	3.5	12.25	35.6	2.90612	m
cskr077	cold	O_cornuta	120	4	16	42.5	2.65625	m
cskr078	cold	O_cornuta	120	3.5	12.25	36.4	2.97143	m
cskr079	cold	O_cornuta	120	4.2	17.64	60.7	3.44104	f
cskr080	cold	O_cornuta	120	3.7	13.69	37.2	2.71731	m
cskr081	cold	O_cornuta	120	3.6	12.96	32.3	2.49228	m
cskr082	cold	O_cornuta	120	4.2	17.64	56.2	3.18594	f
cskr083	cold	O_cornuta	120	3.5	12.25	35.2	2.87347	m
cskr084	cold	O_cornuta	120	4.5	20.25	69.6	3.43704	f
cskr085	cold	O_cornuta	120	4.2	17.64	58.6	3.322	f
cskr086	cold	O_cornuta	120	3.5	12.25	35.5	2.89796	m
cskr087	cold	O_cornuta	120	3.6	12.96	32.4	2.5	m
cskr088	cold	O_cornuta	120	3.6	12.96	34.2	2.63889	m
cskr089	cold	O_cornuta	120	4.6	21.16	75.7	3.5775	f
cskr090	cold	O_cornuta	120	3.7	13.69	36.9	2.6954	m
cskr091	cold	O_cornuta	120	3.3	10.89	27.9	2.56198	m
cskr092	cold	O_cornuta	120	3.7	13.69	36.7	2.68079	m
cskr093	cold	O_cornuta	120	4.5	20.25	68.1	3.36296	f
cskr094	cold	O_cornuta	120	3.5	12.25	36.3	2.96327	m
cskr095	cold	O_cornuta	120	3.4	11.56	29.7	2.5692	m
cskr096	cold	O_cornuta	120	3.8	14.44	42.7	2.95706	m
cskr097	cold	O_cornuta	120	3.5	12.25	36.9	3.01224	m
cskr098	cold	O_cornuta	120	4.5	20.25	66	3.25926	f
cskr099	cold	O_cornuta	120	3.6	12.96	36.7	2.83179	m
cskr100	cold	O_cornuta	120	4.2	17.64	50.9	2.88549	f
cskr101	cold	O_cornuta	120	3.7	13.69	35.8	2.61505	m
cske063	cold	O_cornuta	121	4.5	20.25	64.6	3.19012	f
cske088	cold	O_cornuta	121	3.8	14.44	45.7	3.16482	m
cske094	cold	O_cornuta	121	4.5	20.25	65.9	3.25432	f
cske087	cold	O_cornuta	121	3.5	12.25	30.6	2.49796	m
cske051	cold	O_cornuta	121	4.3	18.49	61.5	3.32612	f
cske085	cold	O_cornuta	121	4.4	19.36	65.6	3.38843	f
cske078	cold	O_cornuta	121	4	16	46.7	2.91875	f
cske084	cold	O_cornuta	121	4.5	20.25	63.9	3.15556	f
cske058	cold	O_cornuta	121	4.3	18.49	61.5	3.32612	f
cske070	cold	O_cornuta	121	4.3	18.49	63.9	3.45592	f
cske038	cold	O_cornuta	121	3.6	12.96	33.2	2.56173	m
cske086	cold	O_cornuta	121	4	16	72.3	4.51875	f
cske060	cold	O_cornuta	121	4.6	21.16	73.8	3.48771	f
cske037	cold	O_cornuta	121	3.5	12.25	33.1	2.70204	m
cske034	cold	O_cornuta	121	3.9	15.21	46.2	3.03748	f
cske041	cold	O_cornuta	121	4.6	21.16	65.9	3.11437	f
cskr102	cold	O_cornuta	121	4.4	19.36	61.7	3.18698	f
cskr103	cold	O_cornuta	121	4.5	20.25	64.6	3.19012	f
cskr104	cold	O_cornuta	121	4.2	17.64	62.5	3.54308	f
cskr105	cold	O_cornuta	121	4.3	18.49	57.5	3.10979	f
cskr106	cold	O_cornuta	121	4.2	17.64	54	3.06122	f
cskr107	cold	O_cornuta	121	4.2	17.64	51.3	2.90816	f
cskr108	cold	O_cornuta	121	4.4	19.36	60.9	3.14566	f
cskr109	cold	O_cornuta	121	4.5	20.25	65.4	3.22963	f
cskr110	cold	O_cornuta	121	4.1	16.81	58.3	3.46817	f
cskr111	cold	O_cornuta	121	4.5	20.25	70.3	3.4716	f
cskr112	cold	O_cornuta	121	4.5	20.25	62.9	3.10617	f
cskr113	cold	O_cornuta	121	4.5	20.25	67.4	3.3284	f
cskr114	cold	O_cornuta	121	4.2	17.64	59.7	3.38435	f
cskr115	cold	O_cornuta	121	4.3	18.49	62.8	3.39643	f
cskr116	cold	O_cornuta	121	3.8	14.44	42.3	2.92936	f
cskr117	cold	O_cornuta	121	4	16	46.9	2.93125	f
cskr118	cold	O_cornuta	121	4.1	16.81	58.9	3.50387	f
cskr119	cold	O_cornuta	121	4.2	17.64	57.6	3.26531	f
cskr120	cold	O_cornuta	121	4.6	21.16	70.9	3.35066	f
cskr121	cold	O_cornuta	121	4.2	17.64	51.5	2.9195	f
cskr122	cold	O_cornuta	121	4.4	19.36	60.5	3.125	f
cskr123	cold	O_cornuta	121	4.3	18.49	61.7	3.33694	f
cskr124	cold	O_cornuta	121	4.1	16.81	49.1	2.92088	f
cskr125	cold	O_cornuta	121	4.3	18.49	63.3	3.42347	f
cskr126	cold	O_cornuta	121	4.4	19.36	62.2	3.21281	f
cskr127	cold	O_cornuta	121	4.2	17.64	59.8	3.39002	f
cskr128	cold	O_cornuta	121	4.6	21.16	70.3	3.32231	f
cskr129	cold	O_cornuta	121	4.6	21.16	80.8	3.81853	f
cskr130	cold	O_cornuta	121	4.7	22.09	81.7	3.69851	f
cskr131	cold	O_cornuta	121	4.3	18.49	59	3.19091	f
cskr132	cold	O_cornuta	121	4.4	19.36	60.5	3.125	f
cskr133	cold	O_cornuta	121	4.8	23.04	79.1	3.43316	f
cskr134	cold	O_cornuta	121	4.3	18.49	60.6	3.27745	f
cskr135	cold	O_cornuta	121	3.5	12.25	31.3	2.5551	m
cskr136	cold	O_cornuta	121	4.7	22.09	71.3	3.2277	f
cskr137	cold	O_cornuta	121	4.5	20.25	65.8	3.24938	f
cskr138	cold	O_cornuta	121	4.4	19.36	65.6	3.38843	f
cskr139	cold	O_cornuta	121	3.4	11.56	27.4	2.37024	m
cskr140	cold	O_cornuta	121	4	16	47.7	2.98125	f
cskr141	cold	O_cornuta	121	4.6	21.16	70.3	3.32231	f
cske075	cold	O_cornuta	122	4.4	19.36	60.7	3.13533	f
cske069	cold	O_cornuta	122	4.4	19.36	59.1	3.05269	f
cske044	cold	O_cornuta	122	4.3	18.49	63.9	3.45592	f
cske074	cold	O_cornuta	122	4.3	18.49	70.3	3.80206	f
cske036	cold	O_cornuta	122	4	16	48.8	3.05	f
cske054	cold	O_cornuta	122	4.7	22.09	74.3	3.36351	f
cske077	cold	O_cornuta	122	4.3	18.49	63.9	3.45592	f
cske079	cold	O_cornuta	122	4.5	20.25	64	3.16049	f
cskr142	cold	O_cornuta	122	4.3	18.49	61.5	3.32612	f
cskr143	cold	O_cornuta	122	3.8	14.44	42.2	2.92244	f
cskr144	cold	O_cornuta	122	3.9	15.21	48.1	3.16239	f
cskr145	cold	O_cornuta	122	4.2	17.64	56.9	3.22562	f
cskr146	cold	O_cornuta	122	3.6	12.96	37	2.85494	f
cskr147	cold	O_cornuta	122	4.2	17.64	56.3	3.19161	f
cskr148	cold	O_cornuta	122	4.3	18.49	58.2	3.14765	f
cskr149	cold	O_cornuta	122	4.2	17.64	52.5	2.97619	f
cskr150	cold	O_cornuta	122	4.3	18.49	56.7	3.06652	f
cskr151	cold	O_cornuta	122	4.5	20.25	68.7	3.39259	f
cskr152	cold	O_cornuta	122	4.2	17.64	60.9	3.45238	f
cskr153	cold	O_cornuta	122	3.7	13.69	40.7	2.97297	f
cske062	cold	O_cornuta	123	4.5	20.25	72.7	3.59012	f
cske027	cold	O_cornuta	123	4.3	18.49	55.6	3.00703	f
cske035	cold	O_cornuta	123	3.9	15.21	49.3	3.24129	f
cske002	cold	O_cornuta	123	4.5	20.25	64.6	3.19012	f
cske072	cold	O_cornuta	123	4.2	17.64	59.5	3.37302	f
cskr154	cold	O_cornuta	123	3.7	13.69	41.8	3.05332	f
cskr155	cold	O_cornuta	123	4.3	18.49	59.3	3.20714	f
cskr156	cold	O_cornuta	123	4.4	19.36	55.6	2.8719	f
cskr157	cold	O_cornuta	123	4.5	20.25	68.6	3.38765	f
cske057	cold	O_cornuta	124	4.4	19.36	55.9	2.8874	f
cske017	cold	O_cornuta	124	4.5	20.25	65.4	3.22963	f
cske024	cold	O_cornuta	125	4.3	18.49	58.6	3.16928	f
cske052	cold	O_cornuta	126	4.2	17.64	54.3	3.07823	f
cske028	cold	O_cornuta	126	4.4	19.36	60.8	3.1405	f
cske095	cold	O_cornuta	126	4.2	17.64	54.6	3.09524	f
cskr158	cold	O_cornuta	126	4.3	18.49	58.1	3.14224	f
cskr159	cold	O_cornuta	126	3.9	15.21	44.4	2.91913	f
cske064	cold	O_cornuta	127	4.7	22.09	71	3.21412	f
cske005	cold	O_cornuta	127	3.6	12.96	41.4	3.19444	f
cske068	cold	O_cornuta	129	4.2	17.64	59.1	3.35034	f
cske083	cold	O_cornuta	129	4	16	46.7	2.91875	f
cskr160	cold	O_cornuta	130	4.8	23.04	65.7	2.85156	f
cskr162	cold	O_cornuta	131	3.6	12.96	33.2	2.56173	f
cskr161	cold	O_cornuta	133	3.8	14.44	43.8	3.03324	f
cskr163	cold	O_cornuta	133	4	16	47.4	2.9625	f
cske081	cold	O_cornuta	136	4	16	45.5	2.84375	f
cske056	cold	O_cornuta	149	4	16	44.7	2.79375	f
rskr001	cold	O_rufa	120	3.2	10.24	23.5	2.29492	m
rske005	cold	O_rufa	121	3.4	11.56	28.1	2.4308	m
rske024	cold	O_rufa	121	3.4	11.56	29.7	2.5692	m
rskr002	cold	O_rufa	121	4	16	49.8	3.1125	m
rskr003	cold	O_rufa	121	3.2	10.24	25.4	2.48047	m
rskr004	cold	O_rufa	121	3.3	10.89	30.4	2.79155	m
rske083	cold	O_rufa	122	3.5	12.25	34.6	2.82449	m
rske094	cold	O_rufa	122	3.5	12.25	31.2	2.54694	m
rske100	cold	O_rufa	122	3.5	12.25	33.9	2.76735	m
rske055	cold	O_rufa	122	3.5	12.25	32.1	2.62041	m
rske008	cold	O_rufa	122	3.5	12.25	32.5	2.65306	m
rske001	cold	O_rufa	122	3.6	12.96	35.4	2.73148	m
rskr005	cold	O_rufa	122	3.4	11.56	33.6	2.90657	m
rskr006	cold	O_rufa	122	3.4	11.56	32.4	2.80277	m
rskr007	cold	O_rufa	122	3.3	10.89	21.4	1.96511	m
rskr008	cold	O_rufa	122	3.5	12.25	33.7	2.75102	m
rskr009	cold	O_rufa	123	3.1	9.61	27.8	2.89282	m
rskr010	cold	O_rufa	123	3.2	10.24	24.5	2.39258	m
rske033	cold	O_rufa	124	3.5	12.25	35.1	2.86531	m
rske039	cold	O_rufa	124	3.3	10.89	26.7	2.45179	m
rske016	cold	O_rufa	124	3	9	22.9	2.54444	m
rske022	cold	O_rufa	124	3.1	9.61	21.6	2.24766	m
rskr011	cold	O_rufa	124	3.5	12.25	36	2.93878	m
rskr012	cold	O_rufa	124	3.2	10.24	25.7	2.50977	m
rskr013	cold	O_rufa	124	3.5	12.25	37.3	3.0449	m
rskr014	cold	O_rufa	124	3.9	15.21	54.8	3.60289	m
rske088	cold	O_rufa	125	3.4	11.56	31.1	2.69031	m
rske053	cold	O_rufa	125	3.4	11.56	34.1	2.94983	m
rske074	cold	O_rufa	125	3.4	11.56	33.3	2.88062	m
rskr015	cold	O_rufa	125	3.3	10.89	29.1	2.67218	m
rskr016	cold	O_rufa	125	3.4	11.56	32.6	2.82007	m
rskr017	cold	O_rufa	125	3.7	13.69	41.9	3.06063	m
rskr018	cold	O_rufa	125	3.2	10.24	31.8	3.10547	m
rskr019	cold	O_rufa	125	3.2	10.24	27.5	2.68555	m
rske065	cold	O_rufa	126	3	9	27.6	3.06667	m
rskr020	cold	O_rufa	126	3.4	11.56	31	2.68166	m
rskr021	cold	O_rufa	126	3.1	9.61	24.7	2.57024	m
rskr022	cold	O_rufa	126	3.2	10.24	23.1	2.25586	m
rskr023	cold	O_rufa	126	3.4	11.56	33.2	2.87197	m
rskr024	cold	O_rufa	126	3.2	10.24	28.2	2.75391	m
rske096	cold	O_rufa	127	3.4	11.56	32.4	2.80277	m
rske095	cold	O_rufa	127	3.4	11.56	30.3	2.62111	m
rske062	cold	O_rufa	127	3.4	11.56	30.8	2.66436	m
rskr025	cold	O_rufa	127	3.4	11.56	32.9	2.84602	m
rskr026	cold	O_rufa	127	3.2	10.24	27.4	2.67578	m
rskr027	cold	O_rufa	127	3.4	11.56	33.8	2.92388	m
rskr028	cold	O_rufa	127	3.5	12.25	37.7	3.07755	m
rskr029	cold	O_rufa	127	3.2	10.24	26.7	2.60742	m
rskr030	cold	O_rufa	127	3.4	11.56	29.8	2.57785	m
rskr031	cold	O_rufa	127	3	9	17.5	1.94444	m
rskr032	cold	O_rufa	127	3.4	11.56	38.1	3.29585	m
rskr033	cold	O_rufa	127	3.4	11.56	33.8	2.92388	m
rske017	cold	O_rufa	128	3.5	12.25	33.5	2.73469	m
rske018	cold	O_rufa	128	3.2	10.24	23.7	2.31445	m
rske052	cold	O_rufa	128	3.2	10.24	28.8	2.8125	m
rske087	cold	O_rufa	128	3.2	10.24	26.5	2.58789	m
rske085	cold	O_rufa	128	3.2	10.24	32.3	3.1543	m
rske066	cold	O_rufa	128	3.4	11.56	25.7	2.22318	m
rskr034	cold	O_rufa	128	3.1	9.61	24.5	2.54943	m
rskr035	cold	O_rufa	128	3.2	10.24	26.2	2.55859	m
rskr036	cold	O_rufa	128	3.4	11.56	29	2.50865	m
rskr037	cold	O_rufa	128	3.5	12.25	34.5	2.81633	m
rskr038	cold	O_rufa	128	3.2	10.24	26.4	2.57812	m
rskr039	cold	O_rufa	128	2.9	8.41	19.8	2.35434	m
rskr040	cold	O_rufa	128	3.3	10.89	29.2	2.68136	m
rskr041	cold	O_rufa	128	3.2	10.24	29	2.83203	m
rskr042	cold	O_rufa	128	3.5	12.25	26.4	2.1551	m
rskr043	cold	O_rufa	128	3.3	10.89	33.6	3.0854	m
rskr044	cold	O_rufa	128	3.2	10.24	24.9	2.43164	m
rske035	cold	O_rufa	129	3	9	21.2	2.35556	m
rske041	cold	O_rufa	129	3.4	11.56	27.7	2.39619	m
rske091	cold	O_rufa	129	3.1	9.61	24.9	2.59105	m
rske099	cold	O_rufa	129	3.3	10.89	32.1	2.94766	m
rskr045	cold	O_rufa	129	3.5	12.25	37.6	3.06939	m
rskr046	cold	O_rufa	129	3.3	10.89	25.2	2.31405	m
rskr047	cold	O_rufa	129	3.7	13.69	41	2.99489	m
rskr048	cold	O_rufa	129	3.1	9.61	22.3	2.3205	m
rskr049	cold	O_rufa	129	3.2	10.24	30	2.92969	m
rskr050	cold	O_rufa	129	3.3	10.89	23.9	2.19467	m
rskr051	cold	O_rufa	129	3	9	21.6	2.4	m
rske056	cold	O_rufa	130	3.2	10.24	25.4	2.48047	m
rske063	cold	O_rufa	130	2.9	8.41	24.3	2.88942	m
rske051	cold	O_rufa	130	3.4	11.56	30.9	2.67301	m
rske093	cold	O_rufa	130	3.5	12.25	33.4	2.72653	m
rske073	cold	O_rufa	130	3.5	12.25	30.1	2.45714	m
rske012	cold	O_rufa	130	3.1	9.61	22.2	2.31009	m
rske098	cold	O_rufa	130	3.1	9.61	25.9	2.69511	m
rske028	cold	O_rufa	130	3.1	9.61	25.6	2.66389	m
rskr052	cold	O_rufa	130	3.4	11.56	32	2.76817	m
rskr053	cold	O_rufa	130	3.4	11.56	31.7	2.74221	m
rskr054	cold	O_rufa	130	3.5	12.25	26.8	2.18776	m
rskr055	cold	O_rufa	130	3.4	11.56	28.8	2.49135	m
rskr057	cold	O_rufa	131	3.3	10.89	32.7	3.00275	m
rskr058	cold	O_rufa	131	3	9	18	2	m
rskr059	cold	O_rufa	131	3.4	11.56	32.1	2.77682	m
rskr060	cold	O_rufa	131	3.4	11.56	27.7	2.39619	m
rskr061	cold	O_rufa	131	3	9	21.2	2.35556	m
rskr062	cold	O_rufa	131	3.3	10.89	32.2	2.95684	m
rskr063	cold	O_rufa	131	3.2	10.24	22.1	2.1582	m
rskr064	cold	O_rufa	131	3.4	11.56	30.2	2.61246	m
rske082	cold	O_rufa	131	3.2	10.24	21.9	2.13867	m
rske013	cold	O_rufa	131	3.1	9.61	23.8	2.47659	m
rskr056	cold	O_rufa	132	3.1	9.61	22.7	2.36212	m
rskr065	cold	O_rufa	132	3.3	10.89	27.8	2.5528	m
rske011	cold	O_rufa	133	3.3	10.89	24	2.20386	m
rske089	cold	O_rufa	133	3.2	10.24	25.8	2.51953	m
rskr066	cold	O_rufa	133	3.4	11.56	32	2.76817	m
rskr067	cold	O_rufa	133	3	9	20.7	2.3	m
rskr068	cold	O_rufa	134	3.9	15.21	50.1	3.29389	m
rskr069	cold	O_rufa	134	3	9	22.6	2.51111	m
rske048	cold	O_rufa	135	3	9	20.7	2.3	m
rske046	cold	O_rufa	135	3	9	20.8	2.31111	m
rske067	cold	O_rufa	136	3.2	10.24	25.6	2.5	m
rskr070	cold	O_rufa	137	3.1	9.61	25.4	2.64308	m
rskr071	cold	O_rufa	137	3.3	10.89	24	2.20386	m
rskr072	cold	O_rufa	138	4	16	47.2	2.95	f
rskr073	cold	O_rufa	139	3.3	10.89	30.1	2.764	m
rskr074	cold	O_rufa	141	3.7	13.69	25.6	1.86998	m
rskr075	cold	O_rufa	142	3.9	15.21	48.7	3.20184	f
rskr076	cold	O_rufa	143	3.9	15.21	44.6	2.93228	f
rske070	cold	O_rufa	145	3.7	13.69	37.5	2.73923	f
rske037	cold	O_rufa	145	3.3	10.89	28.6	2.62626	m
rske036	cold	O_rufa	146	3.5	12.25	37	3.02041	f
rskr077	cold	O_rufa	147	3.9	15.21	50.7	3.33333	f
rskr078	cold	O_rufa	148	3.8	14.44	42.9	2.97091	f
rskr079	cold	O_rufa	148	3.9	15.21	40.5	2.66272	f
rske068	cold	O_rufa	149	3.5	12.25	38.6	3.15102	f
rske071	cold	O_rufa	149	4.1	16.81	50.1	2.98037	f
rske072	cold	O_rufa	149	3.7	13.69	34.1	2.49087	f
rske058	cold	O_rufa	149	3.7	13.69	38.1	2.78305	f
rske060	cold	O_rufa	149	3.8	14.44	43.4	3.00554	f
rske075	cold	O_rufa	149	3.8	14.44	45.8	3.17175	f
rske081	cold	O_rufa	149	3.8	14.44	43.9	3.04017	f
rske080	cold	O_rufa	149	3.1	9.61	25.5	2.65349	f
rske076	cold	O_rufa	149	4.2	17.64	49.9	2.8288	f
rske064	cold	O_rufa	149	3.5	12.25	36.6	2.98776	f
rske006	cold	O_rufa	149	3.3	10.89	34.6	3.17723	f
rske003	cold	O_rufa	149	4.1	16.81	55.5	3.30161	f
rske004	cold	O_rufa	149	3.6	12.96	36.3	2.80093	f
rske023	cold	O_rufa	149	3.8	14.44	40.8	2.82548	f
rske025	cold	O_rufa	149	3.9	15.21	45.5	2.99145	f
rske026	cold	O_rufa	149	3.5	12.25	35.8	2.92245	f
rske002	cold	O_rufa	149	3.5	12.25	35.5	2.89796	f
rske038	cold	O_rufa	149	3.9	15.21	46.1	3.0309	f
rske040	cold	O_rufa	149	3.4	11.56	30.5	2.63841	f
rske030	cold	O_rufa	149	3.6	12.96	37.7	2.90895	f
rske029	cold	O_rufa	149	3.4	11.56	22.7	1.96367	f
rske032	cold	O_rufa	149	3.8	14.44	43	2.97784	f
rske050	cold	O_rufa	149	3.9	15.21	44.6	2.93228	f
rske044	cold	O_rufa	149	3.7	13.69	43	3.14098	f
rske045	cold	O_rufa	149	3.7	13.69	43.2	3.15559	f
rske047	cold	O_rufa	149	3.6	12.96	37.7	2.90895	f
rskr080	cold	O_rufa	149	4.2	17.64	54.2	3.07256	f
rskr081	cold	O_rufa	149	4.2	17.64	54.8	3.10658	f
rskr082	cold	O_rufa	149	3.5	12.25	31.9	2.60408	f
rskr083	cold	O_rufa	149	3.9	15.21	42.4	2.78764	f
rskr084	cold	O_rufa	149	4.1	16.81	51.3	3.05175	f
rskr085	cold	O_rufa	149	3.5	12.25	36.1	2.94694	f
rskr086	cold	O_rufa	149	3.6	12.96	32.5	2.50772	f
rskr087	cold	O_rufa	149	3.7	13.69	42.4	3.09715	f
rskr088	cold	O_rufa	149	4.4	19.36	61.5	3.17665	f
rskr089	cold	O_rufa	149	3.5	12.25	34.8	2.84082	f
rskr090	cold	O_rufa	149	4.3	18.49	58.9	3.18551	f
rskr091	cold	O_rufa	149	3.9	15.21	48.7	3.20184	f
rskr092	cold	O_rufa	149	3.8	14.44	44.7	3.09557	f
rskr093	cold	O_rufa	149	3.4	11.56	30	2.59516	f
rskr094	cold	O_rufa	149	3.9	15.21	38.7	2.54438	f
rskr095	cold	O_rufa	149	3.7	13.69	43.3	3.16289	f
rskr096	cold	O_rufa	149	4.1	16.81	49.6	2.95062	f
rskr097	cold	O_rufa	149	4.1	16.81	45.6	2.71267	f
rskr098	cold	O_rufa	149	4.1	16.81	52.9	3.14694	f
rskr099	cold	O_rufa	149	3.9	15.21	44.8	2.94543	f
rskr100	cold	O_rufa	149	4.2	17.64	49.1	2.78345	f
rskr101	cold	O_rufa	149	4	16	54.3	3.39375	f
rskr102	cold	O_rufa	149	3.6	12.96	31.3	2.41512	f
rskr103	cold	O_rufa	149	3.5	12.25	32.7	2.66939	f
rskr104	cold	O_rufa	149	3.6	12.96	39.2	3.02469	f
rskr105	cold	O_rufa	149	3.8	14.44	49.2	3.4072	f
rskr106	cold	O_rufa	149	3.9	15.21	47.3	3.1098	f
rskr107	cold	O_rufa	149	4	16	49.6	3.1	f
rskr108	cold	O_rufa	149	3.7	13.69	33.4	2.43974	f
rskr109	cold	O_rufa	149	3.9	15.21	44.7	2.93886	f
rskr110	cold	O_rufa	149	3.6	12.96	34.4	2.65432	f
rskr111	cold	O_rufa	149	3.5	12.25	29.5	2.40816	f
rskr112	cold	O_rufa	149	3.7	13.69	44.4	3.24324	f
rskr113	cold	O_rufa	149	4	16	53.1	3.31875	f
rskr114	cold	O_rufa	149	3.7	13.69	41.9	3.06063	f
rskr115	cold	O_rufa	149	3.8	14.44	39.8	2.75623	f
rskr116	cold	O_rufa	149	4.2	17.64	56	3.1746	f
rskr117	cold	O_rufa	149	4.4	19.36	57.3	2.95971	f
rskr118	cold	O_rufa	149	4	16	45.3	2.83125	f
rskr119	cold	O_rufa	149	3.8	14.44	40.8	2.82548	f
rskr120	cold	O_rufa	149	4	16	49.8	3.1125	f
rskr121	cold	O_rufa	149	4	16	48.5	3.03125	f
rskr122	cold	O_rufa	149	4.1	16.81	51.8	3.0815	f
rskr123	cold	O_rufa	149	4	16	42.1	2.63125	f
rskr124	cold	O_rufa	149	4	16	53.8	3.3625	f
rskr125	cold	O_rufa	149	3.9	15.21	50.9	3.34648	f
rskr126	cold	O_rufa	149	3.8	14.44	42.4	2.93629	f
rskr127	cold	O_rufa	149	3.6	12.96	37.4	2.8858	f
rskr128	cold	O_rufa	149	3.7	13.69	32.1	2.34478	f
rskr129	cold	O_rufa	149	3.9	15.21	46.4	3.05062	f
rskr130	cold	O_rufa	149	4	16	51.4	3.2125	f
rskr131	cold	O_rufa	149	3.7	13.69	40	2.92184	f
rskr132	cold	O_rufa	149	4	16	46.9	2.93125	f
rskr133	cold	O_rufa	149	3.8	14.44	40.7	2.81856	f
rskr134	cold	O_rufa	149	3.9	15.21	39	2.5641	f
rskr135	cold	O_rufa	149	3.9	15.21	47.3	3.1098	f
rskr136	cold	O_rufa	149	4.2	17.64	54.4	3.0839	f
rskr137	cold	O_rufa	149	4	16	40.7	2.54375	f
rskr138	cold	O_rufa	149	3.8	14.44	39.5	2.73546	f
rskr139	cold	O_rufa	149	4	16	52.4	3.275	f
rskr140	cold	O_rufa	149	3.9	15.21	42.2	2.77449	f
rskr141	cold	O_rufa	149	3.7	13.69	37.2	2.71731	f
rskr142	cold	O_rufa	149	4	16	47.8	2.9875	f
rskr143	cold	O_rufa	149	4.2	17.64	53.3	3.02154	f
rskr144	cold	O_rufa	149	4.1	16.81	53	3.15289	f
rskr145	cold	O_rufa	149	4	16	48.5	3.03125	f
rskr146	cold	O_rufa	149	3.8	14.44	39.3	2.72161	f
rskr147	cold	O_rufa	149	3.9	15.21	46.1	3.0309	f
rskr148	cold	O_rufa	149	3.7	13.69	38.9	2.84149	f
rskr149	cold	O_rufa	149	4.2	17.64	51.9	2.94218	f
rskr150	cold	O_rufa	149	4	16	44.3	2.76875	f
rskr151	cold	O_rufa	149	3.8	14.44	43.8	3.03324	f
rskr152	cold	O_rufa	149	3.9	15.21	41.8	2.74819	f
rskr153	cold	O_rufa	149	3.9	15.21	45.9	3.01775	f
rskr154	cold	O_rufa	149	3.7	13.69	39.5	2.88532	f
rskr155	cold	O_rufa	149	3.9	15.21	46.7	3.07035	f
rskr156	cold	O_rufa	149	4.2	17.64	54	3.06122	f
rskr157	cold	O_rufa	149	4.1	16.81	56.2	3.34325	f
rskr158	cold	O_rufa	149	4	16	45.7	2.85625	f
rskr159	cold	O_rufa	149	4.1	16.81	50.6	3.01011	f
rskr160	cold	O_rufa	149	3.8	14.44	41.1	2.84626	f
rskr161	cold	O_rufa	149	4.1	16.81	46	2.73647	f
rskr162	cold	O_rufa	149	4	16	45.1	2.81875	f
rskr163	cold	O_rufa	149	3.7	13.69	38.3	2.79766	f
rskr164	cold	O_rufa	149	4.1	16.81	48.7	2.89709	f
rskr165	cold	O_rufa	149	4	16	54.8	3.425	f
rskr166	cold	O_rufa	149	4.1	16.81	51.2	3.04581	f
rskr167	cold	O_rufa	149	3.8	14.44	41.9	2.90166	f
rskr168	cold	O_rufa	149	4.1	16.81	46.7	2.77811	f
rskr169	cold	O_rufa	149	4.3	18.49	58.7	3.17469	f
rskr170	cold	O_rufa	149	4	16	51.1	3.19375	f
rskr171	cold	O_rufa	149	3.8	14.44	48	3.3241	f
rskr172	cold	O_rufa	149	3.9	15.21	42.6	2.80079	f
rskr173	cold	O_rufa	149	4.1	16.81	52.5	3.12314	f
rskr174	cold	O_rufa	149	3.9	15.21	50.5	3.32018	f
rskr175	cold	O_rufa	149	3.8	14.44	39.1	2.70776	f
rskr176	cold	O_rufa	149	3.6	12.96	36.8	2.83951	f
rskr177	cold	O_rufa	149	3.9	15.21	47.3	3.1098	f
rske090	cold	O_rufa	150	3.8	14.44	44.9	3.10942	f
rske009	cold	O_rufa	150	3.9	15.21	41.6	2.73504	f
rske015	cold	O_rufa	150	3.7	13.69	39.8	2.90723	f
rske069	cold	O_rufa	150	3.9	15.21	44.7	2.93886	f
rske086	cold	O_rufa	150	3.8	14.44	39.5	2.73546	f
rske027	cold	O_rufa	150	3.6	12.96	38.2	2.94753	f
rske049	cold	O_rufa	150	3.7	13.69	36.7	2.68079	f
rske019	cold	O_rufa	150	3.6	12.96	35	2.70062	f
rske057	cold	O_rufa	150	3.4	11.56	35.7	3.08824	f
rske034	cold	O_rufa	150	3.7	13.69	39.7	2.89993	f
rske084	cold	O_rufa	150	3.4	11.56	32.9	2.84602	f
rskr178	cold	O_rufa	150	4	16	57.3	3.58125	f
rskr179	cold	O_rufa	150	3.9	15.21	37.8	2.48521	f
rskr180	cold	O_rufa	150	4	16	48.8	3.05	f
rskr181	cold	O_rufa	150	3.9	15.21	44.8	2.94543	f
rskr182	cold	O_rufa	150	4.2	17.64	51.5	2.9195	f
rskr183	cold	O_rufa	150	3.6	12.96	35.3	2.72377	f
rskr184	cold	O_rufa	150	3.7	13.69	36.6	2.67348	f
rskr185	cold	O_rufa	150	4	16	53.7	3.35625	f
rskr186	cold	O_rufa	150	4.1	16.81	44.3	2.63534	f
rske097	cold	O_rufa	151	3.7	13.69	40.7	2.97297	f
rske061	cold	O_rufa	151	3.2	10.24	27	2.63672	f
rske014	cold	O_rufa	151	4	16	44.3	2.76875	f
rske059	cold	O_rufa	151	3.8	14.44	41.9	2.90166	f
rskr187	cold	O_rufa	151	4.1	16.81	52.3	3.11124	f
rskr188	cold	O_rufa	151	3.6	12.96	41.4	3.19444	f
rskr189	cold	O_rufa	151	3.8	14.44	47.5	3.28947	f
rskr190	cold	O_rufa	151	4	16	53	3.3125	f
rske031	cold	O_rufa	152	3.4	11.56	30.7	2.65571	f
rskr191	cold	O_rufa	155	4	16	53.7	3.35625	f
rskr192	cold	O_rufa	155	4	16	45.8	2.8625	f
rskr193	cold	O_rufa	155	3.6	12.96	33.5	2.58488	f
rske042	cold	O_rufa	156	3	9	22.3	2.47778	f
rske007	cold	O_rufa	156	3.4	11.56	33.1	2.86332	f
rske078	cold	O_rufa	157	3.6	12.96	35.4	2.73148	f
rskr194	cold	O_rufa	159	3.8	14.44	40.2	2.78393	f
rskr195	cold	O_rufa	159	3.9	15.21	41.1	2.70217	f
rskr196	cold	O_rufa	159	3.9	15.21	49.8	3.27416	f
rskr197	cold	O_rufa	161	4	16	48.1	3.00625	f
rskr198	cold	O_rufa	161	4	16	49.2	3.075	f

## Sheet: metadata
name of column	significance
ID	ID of each particular bee
treatment	temperature treatment: either warm, medium or cold.
species	bee species: either O. cornuta or O. bicornis (=O. rufa)
Julian date	Julian date of emergence
head.width	head width of bees [mm]
head.width^2	head width of bees [mm] ^2
dry.weight.mg	dry weight of bees [mg]
weight corrected for size [mg/mm^2]	BMI of bees [mg/mm^2]
sex	sex of the bee: either male (m) or female (f)
